# Supplementary material for: An approach to C–N activation: coupling of arenesulfonyl hydrazides and arenesulfonyl chlorides withtert-aminesviaa metal-, oxidant- and halogen-free anodic oxidation
Source: Royal Society of Chemistry journal article supplement (doi:10.1039/c7gc03141f), 2017-01-01
Supplement: c7gc03141f1.pdf [file c7gc03141f1.pdf]

## Supporting Information for

### **An Approach to C-N Activation: Coupling of Arenesulfonyl Hydrazides and Arenesulfonyl Chlorides with *tert*-Amines via a Metal-, Oxidant- and Halogen-free Anodic Oxidation**

Mehdi Sheykhan,<sup>\*†</sup> Sonia Khani,<sup>†</sup> Masoumeh Abbasnia,<sup>\*‡</sup> Sina Shaabanzadeh,<sup>†</sup> Meraj Joafshan

<sup>†</sup>Chemistry Department, University of Guilan, P.O. Box 41335-1914, Rasht, Iran, Fax:  
+981333367262, Email: sheykhan@guilan.ac.ir

<sup>‡</sup>School of Chemistry, College of Science, University of Tehran, P.O. Box 14155-6455, Tehran,  
Iran.

#### **Table of contents:**

|                                                     |        |
|-----------------------------------------------------|--------|
| I-General Information                               | S2     |
| II-Experimental Procedures                          | S2-S4  |
| III-Spectral data                                   | S5-S8  |
| IV-Copies of <sup>1</sup> H- and <sup>13</sup> CNMR | S9-S35 |
| V-References                                        | S36    |

## **I-General Information**

$^1\text{H}$  and  $^{13}\text{C}$ NMR spectra were recorded on 400 and 500 MHz NMR instruments. TMS and  $\text{CDCl}_3$  used as the internal standards for  $^1\text{H}$ NMR and  $^{13}\text{C}$ NMR, respectively. Graphite anodes and cathodes were 2.0 mm 2B pencil graphite purchased from the supermarket.

## **II-Experimental Procedures**

### **II-I-Typical procedure for the synthesis of arenesulfonyl hydrazides<sup>1</sup>**

Into a 25 mL round-bottomed flask, are added 10 mmol of arenesulfonyl chloride and 3.5 mL of tetrahydrofuran. The mixture is cooled to 10 °C and 1.5 mL hydrazine hydrated (85% hydrazine hydrate, 20 mmol) is added. Stirring is continued for further 15 minutes and then the reaction mixture is transferred to a separatory funnel. The organic layer is filtered and washed with 2.5 mL tetrahydrofuran. The colorless filtrates are stirred during the drop-wise addition of 12 mL of distilled water. Arenesulfonyl hydrazide separates as fluffy crystalline needles. The product is washed several times with distilled water, and air-dried.

### **II-II-Electrochemical synthesis of sulfonamides from arenesulfonyl chlorides**

An undivided cell was equipped with two pencil graphite electrodes (2.0 mm, 2B) and connected with a DC power supply (Figure S1). A mixture of arenesulfonyl chloride (0.5 mmol), *tert*-amine (1 mmol), and  $\text{Na}_2\text{SO}_4$  (1.25 mmol, 0.5 M) in  $\text{H}_2\text{O}$  (2.5 mL) was added to the cell. The electrolyte was allowed to stir and the electrolysis was carried out at a constant current of 10 mA (electrode square 1.7  $\text{cm}^2$ ) at room temperature for 3.2 h until the quantity of the electricity 2.4 F/mol was passed. After washing the mixture with 10% brine solution and extraction with ethyl acetate, the organic layer was dried over sodium sulfate and evaporated under reduced pressure. The organic residue was purified by a silica loaded column chromatography with 1:20 ethyl acetate in hexane as eluent.

### **II-III-Electrochemical synthesis of sulfonamides from arenesulfonyl hydrazides**

An undivided cell was equipped with two pencil graphite electrodes (2.0 mm, 2B) and connected with a DC power supply (Figure S1). A mixture of arenesulfonyl hydrazide (0.5 mmol), *tert*-amine (1 mmol), and Na<sub>2</sub>SO<sub>4</sub> (1.25 mmol, 0.5 M) in water/acetonitrile (1:1, 2.5 mL) was added to the cell. The electrolyte was allowed to stir and the electrolysis was carried out at a constant current of 10 mA (electrode square 1.7 cm<sup>2</sup>) at room temperature for 9 h until the quantity of the electricity 6.7 F/mol was passed. After washing the mixture with 10% brine solution and extraction with ethyl acetate, the organic layer was dried over sodium sulfate and evaporated under reduced pressure. The organic residue was purified by a silica loaded column chromatography with 1:20 ethyl acetate in hexane as eluent.

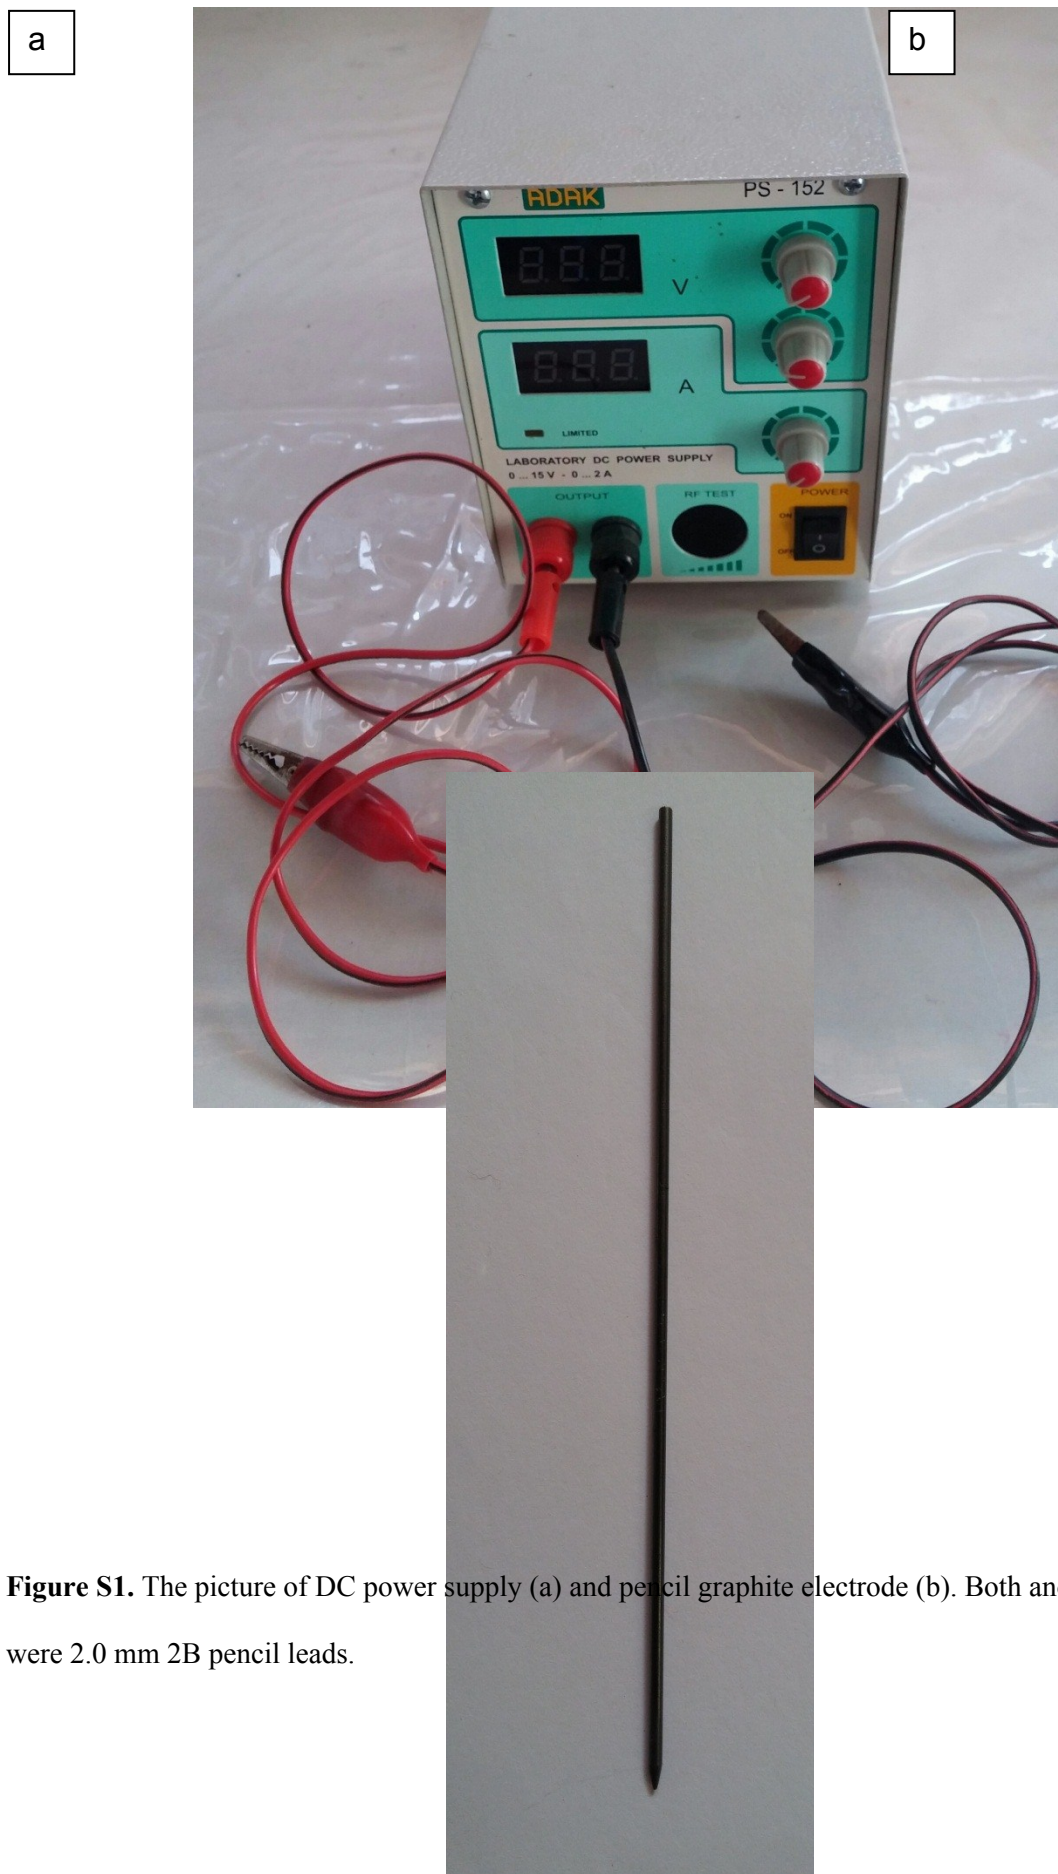

**Figure S1.** The picture of DC power supply (a) and pencil graphite electrode (b). Both anode and cathode were 2.0 mm 2B pencil leads.

### III-Spectral data

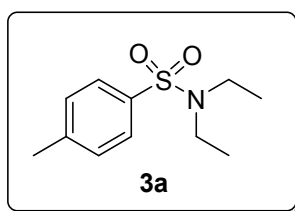

***N,N*-Diethyl-4-methylbenzenesulfonamide (3a):** 71% yield. White crystal, mp 60-62 °C; <sup>1</sup>HNMR (500 MHz, CDCl<sub>3</sub>) δ 7.68 (d, *J*= 8.0 Hz, 2H), 7.27 (d, *J*= 8.0 Hz, 2H), 3.22 (q, *J*= 7.0, 4H), 2.41 (s, 3H), 1.12 (t, *J*= 7.0 Hz, 6H); <sup>13</sup>CNMR (125 MHz, CDCl<sub>3</sub>) δ 142.8, 137.5, 129.6, 127.1, 42.0, 21.4, 14.1. Known compound.<sup>2</sup>

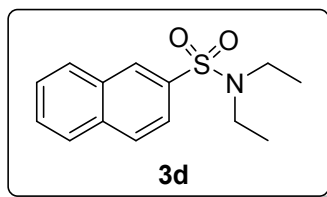

***N,N*-diethylnaphthalene-2-sulfonamide (3d):** 72% yield. White crystal, mp 81-83 °C; <sup>1</sup>HNMR (400 MHz, DMSO-*d*<sub>6</sub>) δ 8.49 (d, *J*= 1.2 Hz, 1H), 8.20 (d, *J*= 7.6 Hz, 1H), 8.14 (d, *J*= 8.4 Hz, 1H), 8.06 (d, *J*= 8.0 Hz, 1H), 7.82 (dd, *J*=8.4, 1.6 Hz, 1H), 7.66-7.74 (m, 2H), 3.23 (q, *J*= 7.2 Hz, 4H), 1.05 (t, *J*= 7.2 Hz, 6H). Anal. Calcd for C<sub>14</sub>H<sub>17</sub>NO<sub>2</sub>S: C, 63.85; H, 6.51; N, 5.32; S, 12.18. Found: C, 63.81; H, 6.50; N, 5.33; S, 12.10. Known comound.<sup>3</sup>

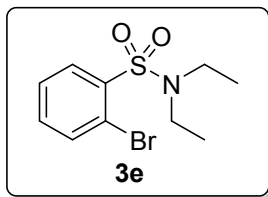

**2-Bromo-*N,N*-diethylbenzenesulfonamide (3e):** 70% yield. White crystal, mp 74-76 °C; <sup>1</sup>HNMR (400 MHz, CDCl<sub>3</sub>) δ 7.55-7.69 (m, 3H), 7.40 (d, *J* = 8.4 Hz, 1H), 3.16 (q, *J* = 7.2 Hz, 4H), 1.06 (t, *J* = 7.2 Hz, 6H). Anal. Calcd for C<sub>10</sub>H<sub>14</sub>BrNO<sub>2</sub>S: C, 41.11; H, 4.83; N, 4.79; 10.97. Found: C, 41.02; H, 4.76; N, 4.86; S, 11.04.

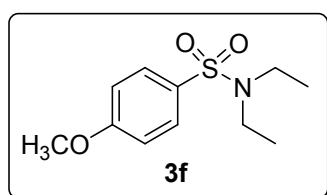

***N,N*-Diethyl-4-methoxybenzenesulfonamide (3f):** 77% yield. White crystal, mp 60-62 °C; <sup>1</sup>HNMR (500 MHz, CDCl<sub>3</sub>) δ 7.76 (d, *J* = 7.0 Hz, 2H), 6.97 (d, *J* = 7.0 Hz, 2H), 3.88 (s, 3H), 3.23 (q, *J* = 7.1 Hz, 4H), 1.40 (t, *J* = 7.1 Hz, 6H). Known compound.<sup>4</sup>

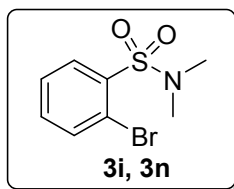

***N,N*-Dimethyl-2-bromosulfonamide (3i, 3n):** 72% yield (74% yield for **3n**). Pale crystal, mp 87-89 °C; <sup>1</sup>HNMR (400 MHz, CDCl<sub>3</sub>) δ 7.75 (d, *J* = 8.4 Hz, 1H), 7.72 (d, *J* = 8.8 Hz, 1H), 7.67 (d, *J* = 8.8 Hz, 1H), 7.55 (d, *J* = 8.4 Hz, 1H), 2.74 (s, 6H); <sup>13</sup>CNMR (100 MHz, CDCl<sub>3</sub>) δ 134.5, 132.3, 129.4, 129.2, 129.1, 127.8, 37.9. Anal. Calcd for C<sub>8</sub>H<sub>10</sub>BrNO<sub>2</sub>S: C, 36.38; H, 3.82; N, 5.30; S, 12.14. Found: C, 36.30; H, 3.73; N, 5.31; S, 12.12.

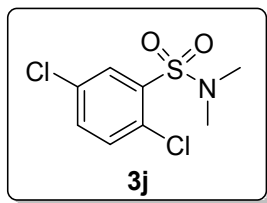

***N,N*-Dimethyl-2,5-dichlorobenzenesulfonamide (3j):** 76% yield. White crystal, mp 73-76 °C; <sup>1</sup>HNMR (500 MHz, CDCl<sub>3</sub>) δ 8.06 (s, 1H), 7.46-7.48 (m, 2H), 2.94 (s, 6H). Anal. Calcd for C<sub>8</sub>H<sub>9</sub>Cl<sub>2</sub>NO<sub>2</sub>S: C, 37.81; H, 3.57; N, 5.51; S 12.62. Found: C, 37.76; H, 3.51; N, 5.48; S, 12.65. Known compound.<sup>5</sup>

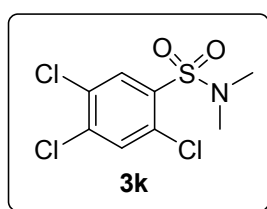

***N,N*-Dimethyl-2,4,5-trichlorobenzenesulfonamide (3k):** 72% yield. White crystal, mp 105-106 °C; <sup>1</sup>HNMR (500 MHz, CDCl<sub>3</sub>) δ 8.17 (s, 1H), 7.66 (s, 1H), 2.92 (s, 6H). Anal. Calcd for C<sub>8</sub>H<sub>8</sub>Cl<sub>3</sub>NO<sub>2</sub>S: C, 33.30; H, 2.79; N, 4.85; S, 11.11. Found: C, 33.21; H, 2.73; N, 4.78; S, 11.00. Known compound.<sup>6</sup>

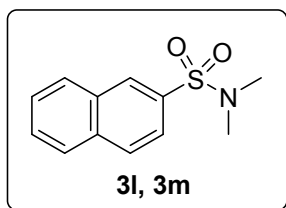

***N,N*-Dimethyl-naphthalene-2-sulfonamide (3l, 3m):** 71% yield (78% yield for **3m**). White crystal, mp 93-96 °C; <sup>1</sup>HNMR (400 MHz, CDCl<sub>3</sub>) δ 8.21 (d, *J*= 1.2 Hz, 1H), 7.90-7.95 (m, 3H), 7.68 (td, *J*= 7.2, 1.2 Hz, 1H), 7.63 (td, *J*= 7.2, 1.2 Hz, 1H), 7.52 (dd, *J*= 8.8, 2.0 Hz, 1H), 7.29-7.35 (m, 3H), 7.13-7.16 (m, 2H). Known compound.<sup>7</sup>

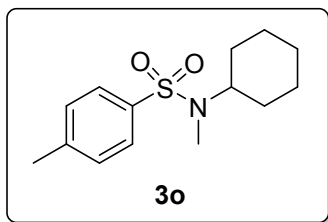

***N*-Cyclohexyl-*N*-methyl-4-methylbenzenesulfonamide (3o):** 69% yield. White crystal, mp 73-76 °C; <sup>1</sup>HNMR (500 MHz, CDCl<sub>3</sub>) δ 7.70 (d, *J*= 8.3 Hz, 2H), 7.29 (d, *J*= 8.3 Hz, 2H), 3.77 (m, 1H), 2.74 (s, 3H), 2.43 (s, 3H), 1.47-1.74 (m, 5H), 1.25-1.34 (m, 4H), 0.89-1.04 (m, 1H). Known compound.<sup>8</sup>

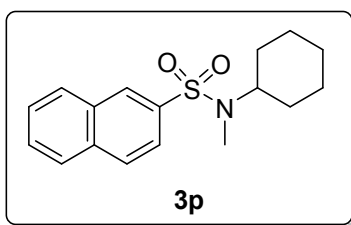

***N*-Cyclohexyl-*N*-methylnaphthalene-2-sulfonamide (3p):** 75% yield. White crystal, mp 76-79 °C; <sup>1</sup>HNMR (500 MHz, CDCl<sub>3</sub>) δ 8.41 (s, 1H), 7.96-7.99 (m, 2H), 7.92 (d, *J*= 7.6, 1H), 7.81 (dd, *J*= 8.6 Hz, 1.7 Hz, 1H), 7.61-7.65 (m, 2H), 3.86-3.90 (m, 1H), 2.82 (s, 3H), 1.54-1.74 (m, 5H), 1.27-1.37 (m, 4H), 0.92-1.03 (m, 1H). <sup>13</sup>CNMR (100 MHz, CDCl<sub>3</sub>) δ 137.3, 134.6, 132.2, 129.3, 129.2, 128.5, 128.1, 127.9, 127.4, 122.5, 56.9, 30.4, 28.7, 25.8, 25.3. Anal. Calcd for C<sub>17</sub>H<sub>21</sub>NO<sub>2</sub>S: C, 67.30; H, 6.98; N, 4.62; S, 10.57. Found: C, 67.21; H, 6.91; N, 4.56; S, 10.52.



#### **IV-Copies of $^1\text{H}$ - and $^{13}\text{C}$ NMR**

Abbas nia 4026

7.695  
7.679  
7.285  
7.269  
7.258

3.244  
3.229  
3.215  
3.201  
2.411

1.135  
1.107

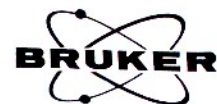

===== CHANNEL f1 =====  
Date: 20110611  
Time: 10:45  
INSTRUM spect  
PROBHD 5 mm PABBO BB-  
PULPROG zgpg30  
TD 32768  
SOLVENT D2O  
NS 8  
DS 0  
SWH 12500.000 Hz  
FIDRES 0.381470 Hz  
AQ 1.3107700 sec  
RG 18  
DW 40.000 usec  
DE 6.50 usec  
TE 303.6 K  
D1 1.00000000 sec  
TD0 1

F2 - Acquisition Parameters  
Date: 20110611  
Time: 10:45  
INSTRUM spect  
PROBHD 5 mm PABBO BB-  
PULPROG zgpg30  
TD 32768  
SOLVENT D2O  
NS 8  
DS 0  
SWH 12500.000 Hz  
FIDRES 0.381470 Hz  
AQ 1.3107700 sec  
RG 18  
DW 40.000 usec  
DE 6.50 usec  
TE 303.6 K  
D1 1.00000000 sec  
TD0 1

===== CHANNEL f1 =====  
NUC1 1H  
P1 9.00 usec  
PL1 -1.00 dB  
SFO1 500.0339750 MHz

F2 - Processing parameters  
SI 32768  
SF 500.0293746 MHz  
WDW EM  
SSB 0  
LB 0.00 Hz  
GB 0  
PC 2.00

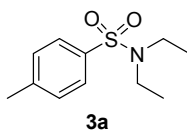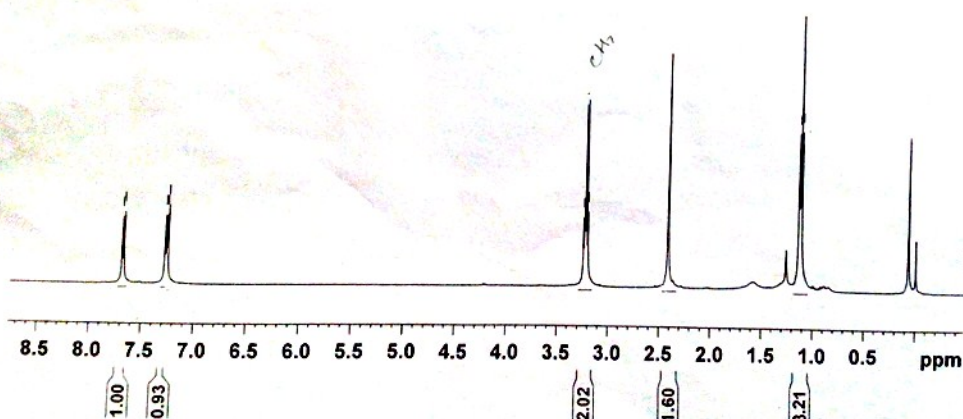

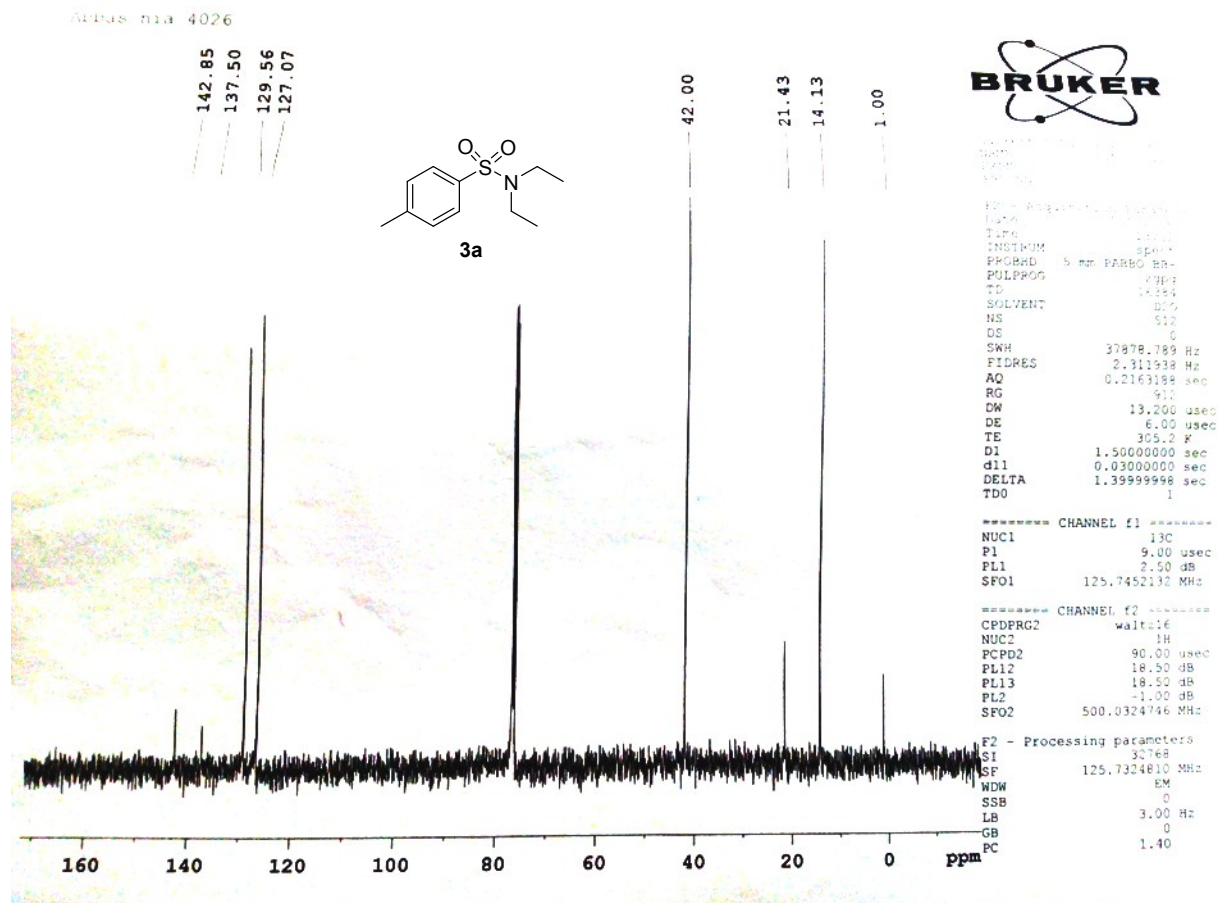

Sample code: B (shafeei pour)

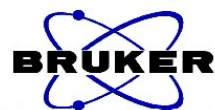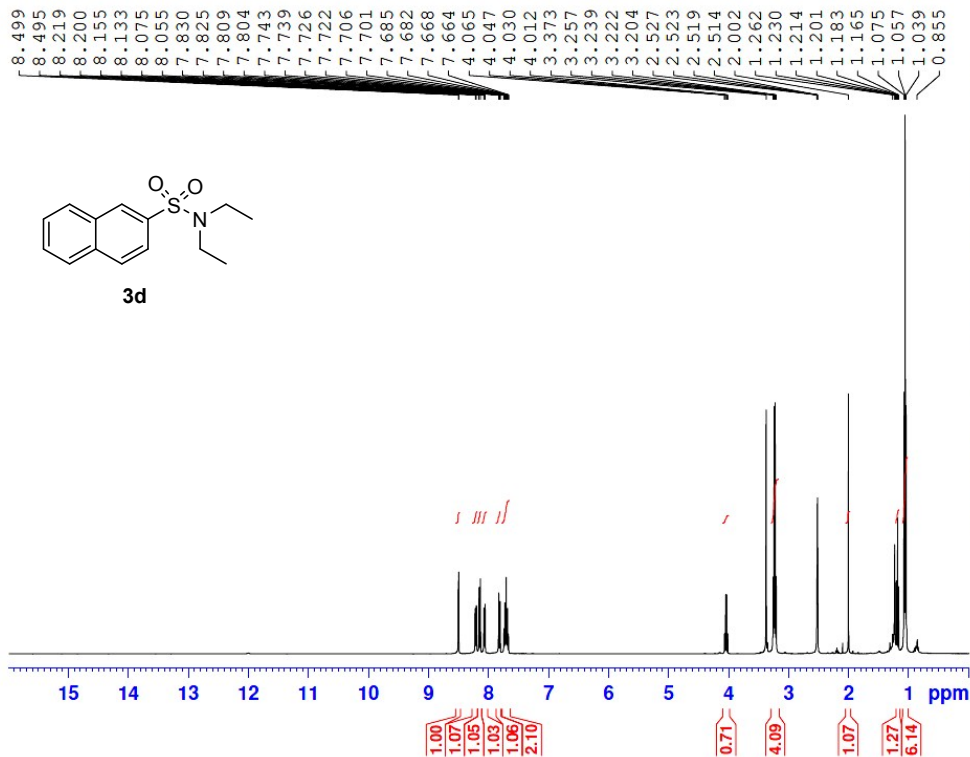

NAME Gilan UN  
EXPNO 2228  
PROCNO 1  
Date\_ 20160213  
Time\_ 17.33  
INSTRUM spect  
PROBHD 5 mm PABBO BB-  
PULPROG zg30  
TD 65536  
SOLVENT DMSO  
NS 20  
DS 0  
SWH 8012.820 Hz  
FIDRES 0.122266 Hz  
AQ 4.0894966 sec  
RG 101  
DW 62.400 usec  
DE 6.50 usec  
TE 293.2 K  
D1 4.00000000 sec  
TD0 1

===== CHANNEL f1 =====  
NUC1 1H  
P1 14.00 usec  
PL1 -2.00 dB  
PL1W 11.86359406 W  
SFO1 400.2236020 MHz  
SI 32768  
SF 400.2200000 MHz  
WDW EM  
SSB 0  
LB 0.30 Hz  
GB 0  
PC 1.00

Sample code: B (shafeei pour)

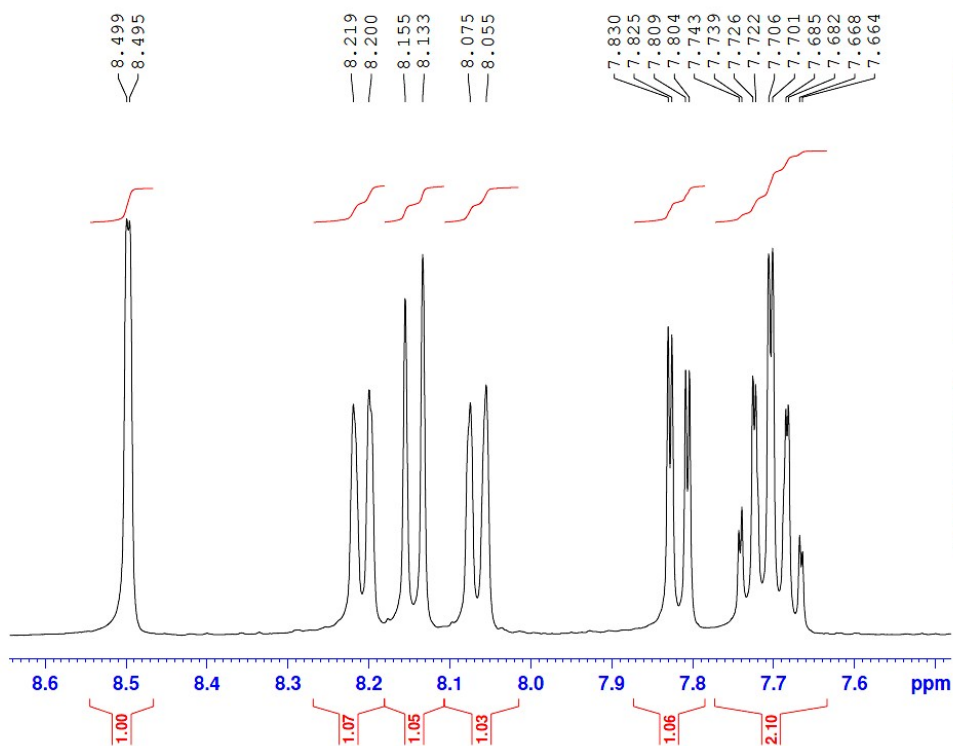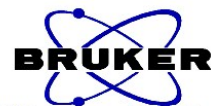

NAME Gilan UN  
EXPNO 2228  
PROCNO 1  
Date\_ 20160213  
Time\_ 17.33  
INSTRUM spect  
PROBHD 5 mm PABBO BB-  
PULPROG zg30  
TD 65536  
SOLVENT DMSO  
NS 20  
DS 0  
SWH 8012.820 Hz  
FIDRES 0.122266 Hz  
AQ 4.0894966 sec  
RG 101  
DW 62.400 usec  
DE 6.50 usec  
TE 293.2 K  
D1 4.00000000 sec  
TD0 1

===== CHANNEL f1 =====  
NUC1 1H  
P1 14.00 usec  
PL1 -2.00 dB  
PL1W 11.86359406 W  
SFOL 400.2236020 MHz  
SI 32768  
SF 400.2200000 MHz  
WDW EM  
SSB 0  
LB 0.30 Hz  
GB 0  
PC 1.00

SpinWorks 4: K

H1 CDCl3 D:\ Administrator 34

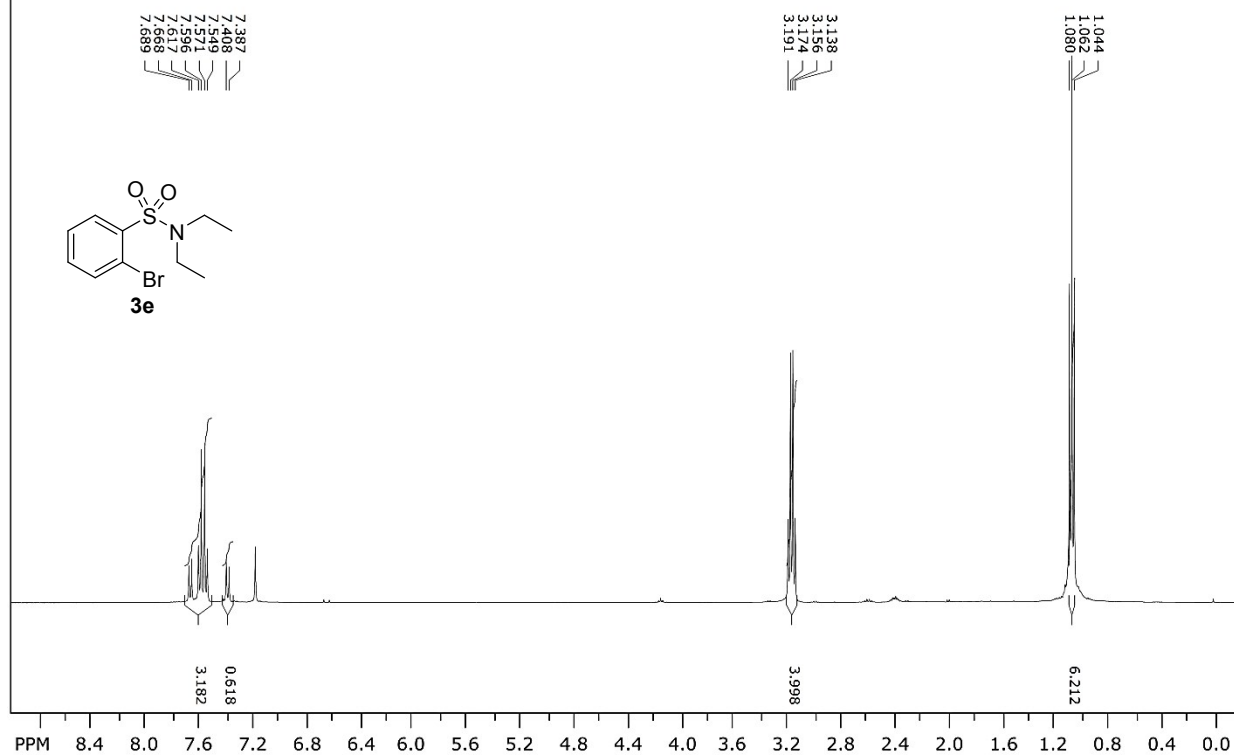

file: ...ta\2-Br sulfonyl chloride+NEt3\fid expt: <zg>  
transmitter freq.: 400.132601 MHz  
time domain size: 50504 points  
width: 8417.51 Hz = 21.0368 ppm = 0.166670 Hz/pt  
number of scans: 32

freq. of 0 ppm: 400.130038 MHz  
processed size: 32768 complex points  
LB: 0.300 GF: 0.0000  
Hz/cm: 147.785 ppm/cm: 0.36934

SpinWorks 4: K

H1 CDCl3 D:\\ Administrator 34

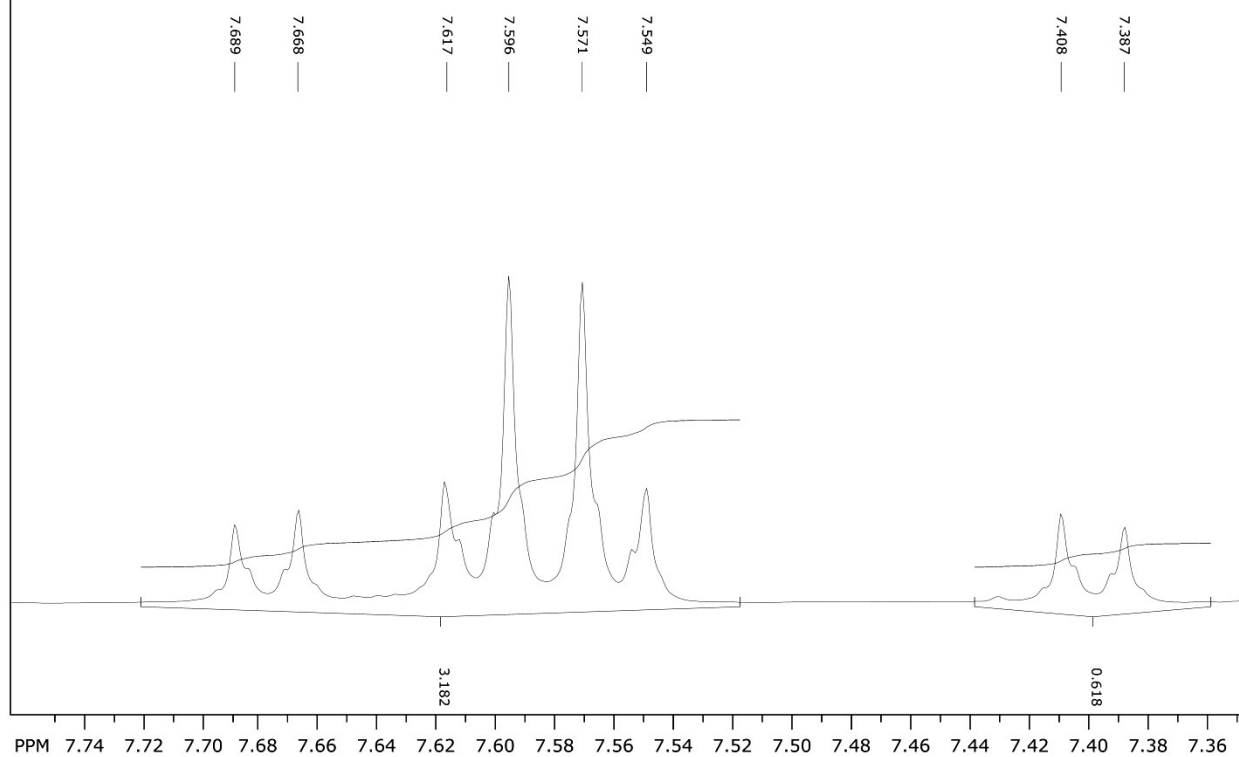

file: ...ta\2-Br sulfonyl chloride+NET3\fid expt: <zg>  
transmitter freq.: 400.132601 MHz  
time domain size: 50504 points  
width: 8417.51 Hz = 21.0368 ppm = 0.166670 Hz/pt  
number of scans: 32

freq. of 0 ppm: 400.130038 MHz  
processed size: 32768 complex points  
LB: 0.300 GF: 0.0000  
Hz/cm: 6.695 ppm/cm: 0.01673

D 1HNMR in CDCl3 at 298 K 95/5/20

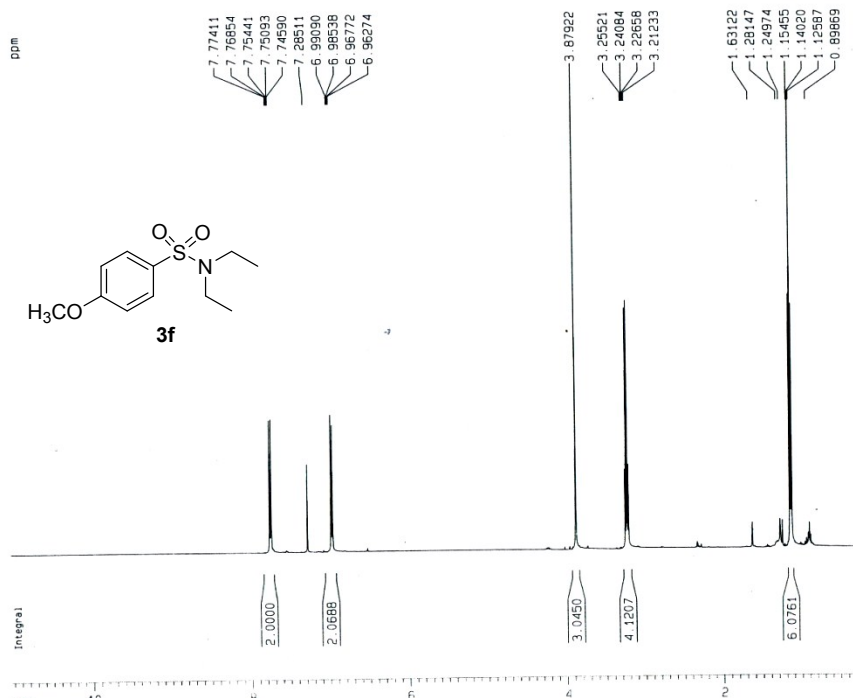

Current Data Parameters  
NAME Khaf1  
EXPNO 6  
PROCNO 1

F2 - Acquisition Parameters  
Date\_ 20160810  
Time 12.32  
INSTRUM spect  
PROBHD 5 mm QNP 1H/1  
PULPROG zgpg30  
TD 32768  
SOLVENT DMSO  
NS 16  
DS 0  
SWH 10330.578 Hz  
FIDRES 0.315254 Hz  
AQ 1.5850695 sec  
RG 256  
DW 48.400 usec  
DE 6.00 usec  
TE 298.0 K  
D1 5.00000000 sec  
MCREST 0.00000000 sec  
MCWRR 0.01500000 sec

\*\*\*\*\* CHANNEL f1 \*\*\*\*\*  
NUC1 1H  
P1 10.50 usec  
PL1 -3.00 dB  
SFO1 500.1330885 MHz

F2 - Processing parameters  
SI 32768  
SF 500.1300000 MHz  
WDW EM  
SSB 0  
LB 0.30 Hz  
GB 0  
PC 1.00

1D NMR plot parameters  
CX 20.00 cm  
CY 12.50 cm  
F1 5522.72 Hz  
F2P 0.240 ppm  
F2 119.95 Hz  
PPMCH 0.54014 ppm/cm  
HZCH 270.13670 Hz/cm



D 1H NMR in CDCl3 at 298 K 95/5/20

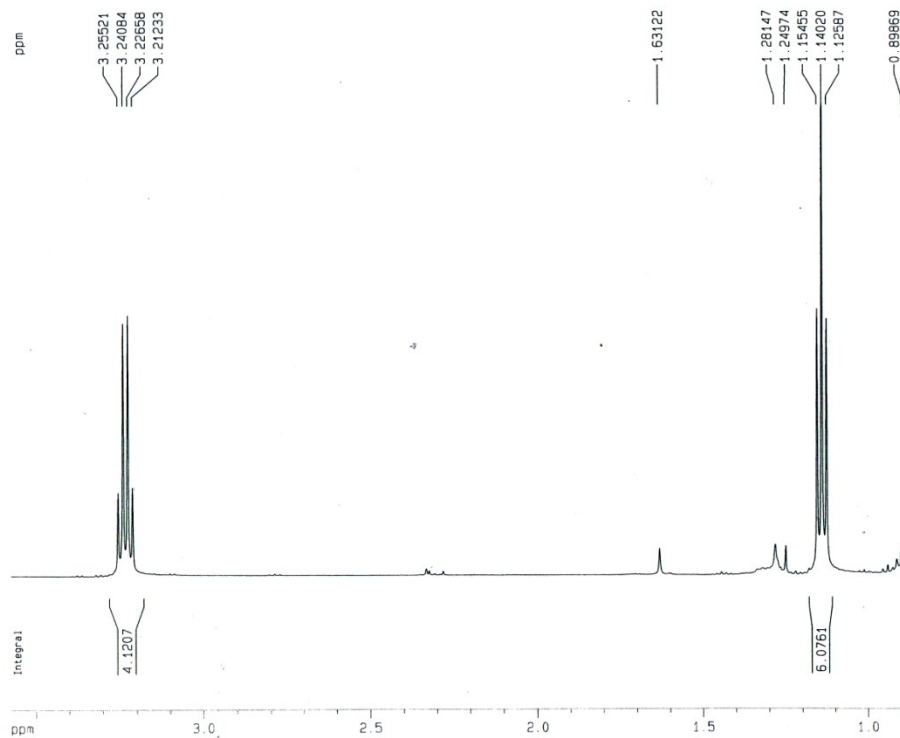

Current Data Parameters  
NAME Khaf1  
EXPNO 6  
PROCNO 1

F2 - Acquisition Parameters  
Date\_ 20160810  
Time 12.32  
INSTRUM spect  
PROBHD 5 mm QNP  
PULPROG zg30  
TD 32768  
SOLVENT DMSO  
NS 16  
DS 0  
SWH 10330.578 Hz  
FIDRES 0.315264 Hz  
AQ 1.5860696 sec  
RG 256  
DM 48.400 usec  
DE 6.00 usec  
TE 298.0 K  
D1 5.00000000 sec  
MCREST 0.00000000 sec  
MCWAK 0.01500000 sec

\*\*\*\*\* CHANNEL f1 \*\*\*\*\*  
NUC1 1H  
P1 10.50 usec  
PL1 -3.00 dB  
SF01 500.1330885 MHz

F2 - Processing parameters  
SI 32768  
SF 500.1300000 MHz  
WDW EM  
SSB 0  
LB 0.30 Hz  
GB 0  
PC 1.00

1D NMR plot parameters  
CX 20.00 cm  
CY 12.50 cm  
F1P 3.577 ppm  
F1 1788.91 Hz  
F2P 0.892 ppm  
F2 445.98 Hz  
PPMCM 0.13426 ppm/cm  
HZCM 67.14655 Hz/cm

D 1H NMR in CDCl3 at 298 K 95/5/20

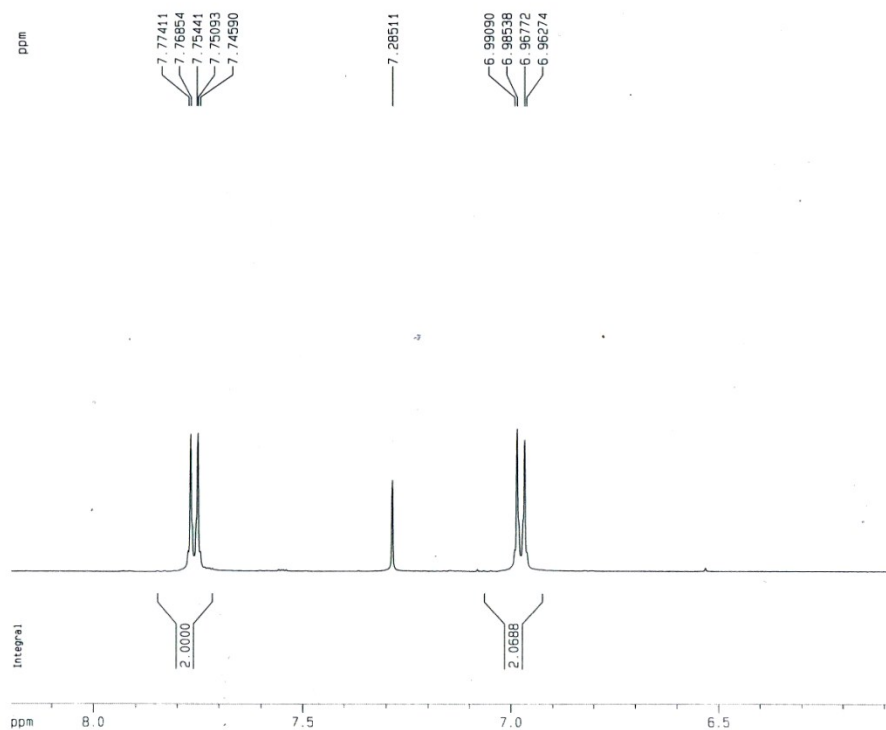

Current Data Parameters  
NAME Khafi  
EXPNO 6  
PROCNO 1

F2 - Acquisition Parameters  
Date\_ 20160810  
Time 12.32  
INSTRUM spect  
PROBHD 5 mm QNP 1H/1  
PULPROG zg30  
TD 32768  
SOLVENT DMSO  
NS 16  
DS 0  
SWH 10330.578 Hz  
FIDRES 0.315264 Hz  
AQ 1.5860696 sec  
RG 256  
DM 48.400 usec  
DE 6.00 usec  
TE 298.0 K  
D1 5.00000000 sec  
MCREST 0.00000000 sec  
MCWRK 0.01500000 sec

===== CHANNEL f1 =====  
NUC1 1H  
P1 10.50 usec  
PL1 -3.00 dB  
SFO1 500.1330885 MHz

F2 - Processing parameters  
SI 32768  
SF 500.1300000 MHz  
WDW EM  
SSB 0  
LB 0.30 Hz  
GB 0  
PC 1.00

ID NMR plot parameters  
CX 20.00 cm  
CY 12.50 cm  
F1P 8.198 ppm  
F1 4100.14 Hz  
F2P 6.075 ppm  
F2 3038.11 Hz  
PPMCH 0.10618 ppm/cm  
HZCM 53.10135 Hz/cm

Sample code:12 (shafieepour)

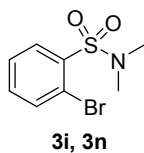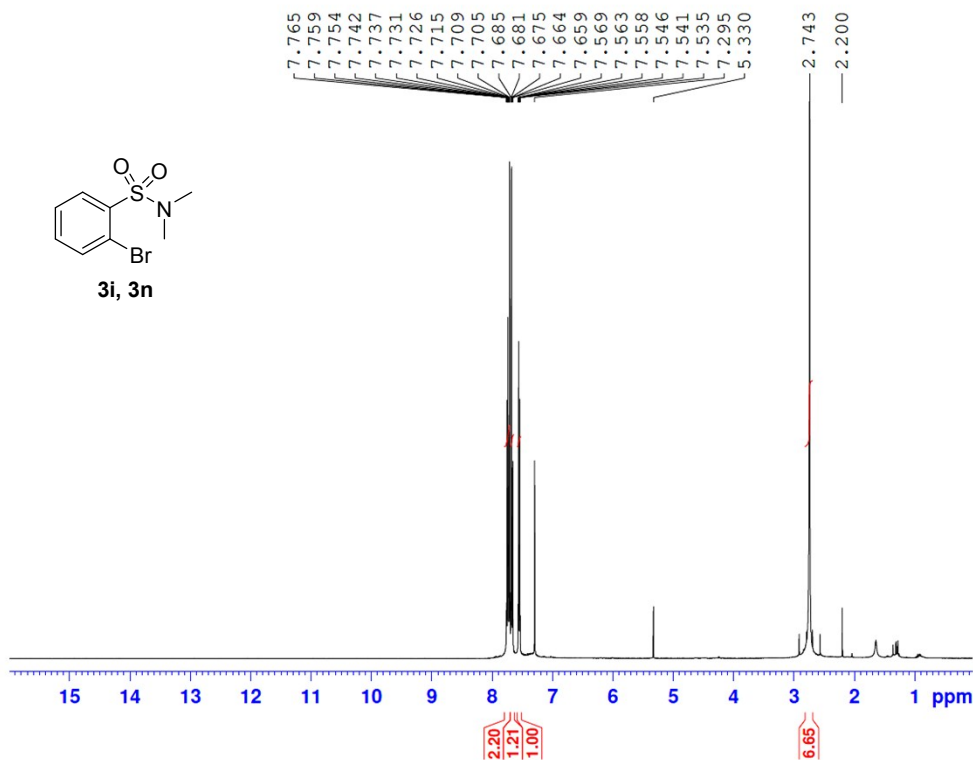

**BRUKER**

```

NAME      Gilan UN
EXPNO     2447
PROCNO    1
Date_     20160612
Time      17.35
INSTRUM   spect
PROBHD    5 mm PABBO BB-
PULPROG   zg30
TD         65536
SOLVENT   CDCl3
NS         20
DS         0
SWH        8012.820 Hz
FIDRES     0.122266 Hz
AQ         4.0894966 sec
RG         161
DW         62.400 usec
DE         6.50 usec
TE         296.5 K
D1         4.00000000 sec
TD0        1

----- CHANNEL f1 -----
NUC1       1H
P1         14.00 usec
PL1        -2.00 dB
PL1W       11.86359406 W
SFO1       400.2236020 MHz
SI         32768
SF         400.2200000 MHz
WDW        EM
SSB        0
LB         0.30 Hz
GB         0
PC         1.00
  
```

Sample code:12 (shafieepour)

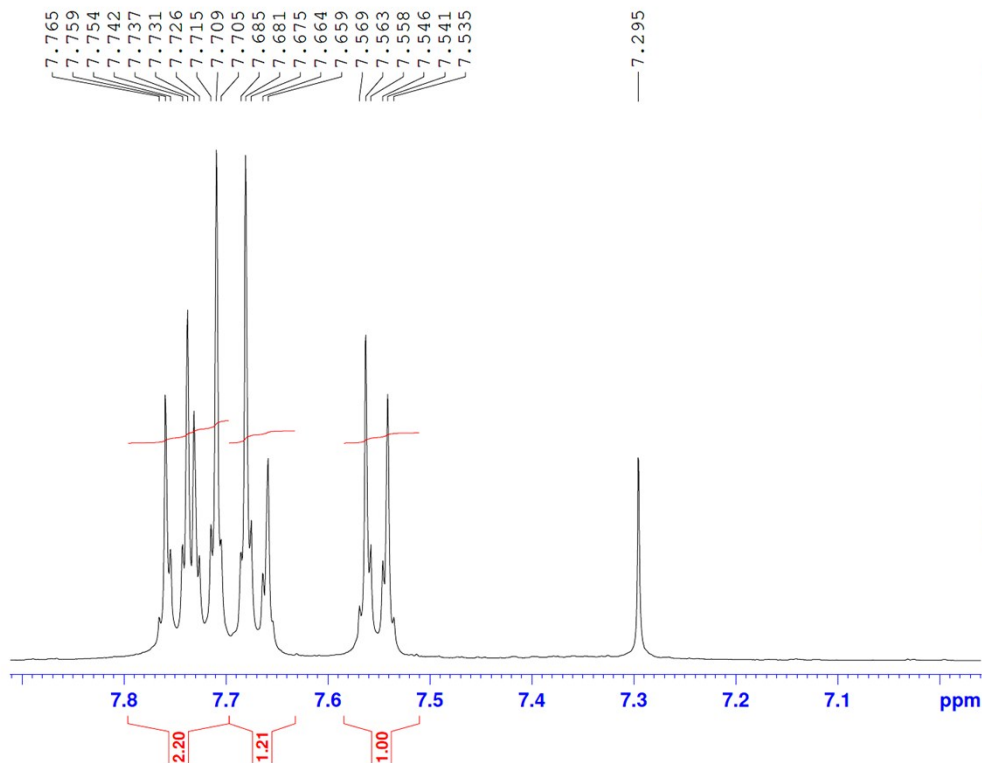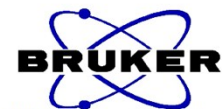

NAME Gilan UN  
EXPNO 2447  
PROCNO 1  
Date\_ 20160612  
Time 17.35  
INSTRUM spect  
PROBHD 5 mm PABBO BB-  
PULPROG zg30  
TD 65536  
SOLVENT CDCl3  
NS 20  
DS 0  
SWH 8012.820 Hz  
FIDRES 0.122266 Hz  
AQ 4.0894966 sec  
RG 161  
DW 62.400 usec  
DE 6.50 usec  
TE 296.5 K  
D1 4.0000000 sec  
TD0 1

===== CHANNEL f1 =====  
NUC1 1H  
P1 14.00 usec  
PL1 -2.00 dB  
PL1W 11.86359406 W  
SFO1 400.2236020 MHz  
SI 32768  
SF 400.2200000 MHz  
WDW EM  
SSB 0  
LB 0.30 Hz  
GB 0  
PC 1.00

C13c CDCl<sub>3</sub> D:\ Administrator 35

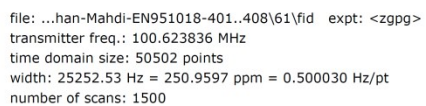

freq. of 0 ppm: 100.612769 MHz  
processed size: 32768 complex points  
LB: 1.000 GF: 0.0000  
Hz/cm: 910.895 ppm/cm: 9.05247

SpinWorks 4: G

C13c CDCl3 D:\Administrator 35

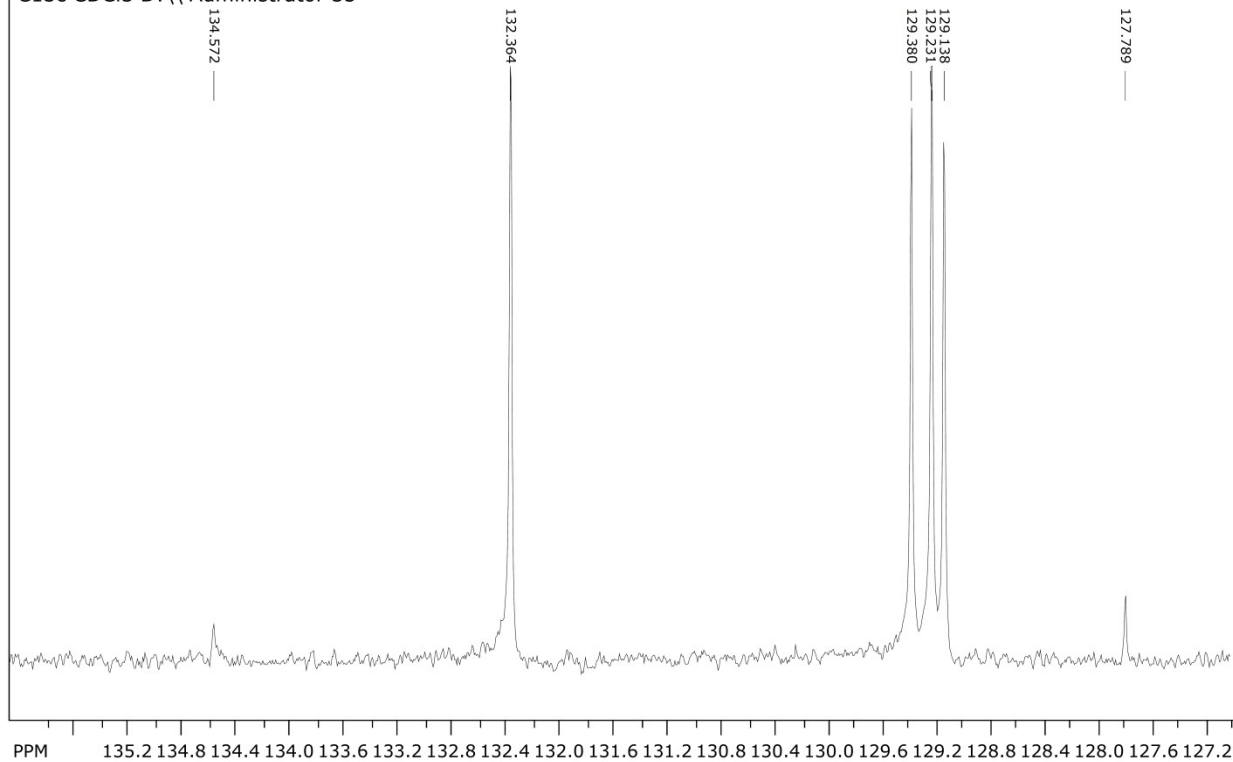

file: ...han-Mahdi-EN951018-401..408\61\fid expt: <zpgp>  
transmitter freq.: 100.623836 MHz  
time domain size: 50502 points  
width: 25252.53 Hz = 250.9597 ppm = 0.500030 Hz/pt  
number of scans: 1500

freq. of 0 ppm: 100.612769 MHz  
processed size: 32768 complex points  
LB: 1.000 GF: 0.0000  
Hz/cm: 36.612 ppm/cm: 0.36385

F 1H NMR in CDCl3 at 298 K 95/5/20

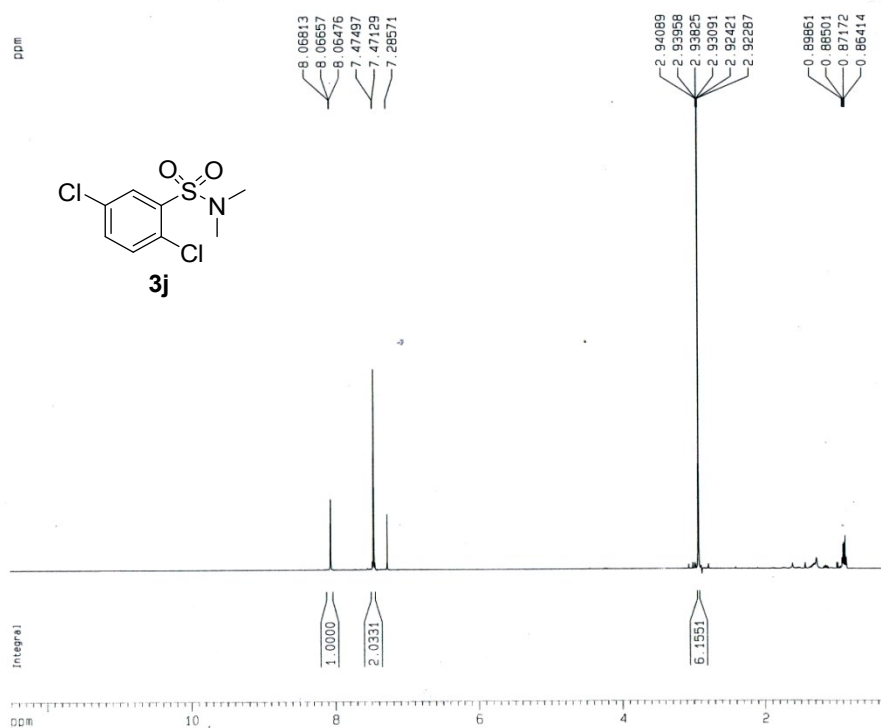

Current Data Parameters  
NAME Khaf1  
EXPNO 5  
PROCNO 1

F2 - Acquisition Parameters  
Date\_ 20160810  
Time 12.26  
INSTRUM spect  
PROBHD 5 mm QNP 1H/1  
PULPROG zg30  
TD 32768  
SOLVENT DMSO  
NS 16  
DS 0  
SWH 10330.578 Hz  
FIDRES 0.315264 Hz  
AQ 1.5860696 sec  
RG 256  
DW 48.400 usec  
DE 6.00 usec  
TE 298.0 K  
D1 5.00000000 sec  
MCREST 0.00000000 sec  
MCWRR 0.01500000 sec

----- CHANNEL f1 -----  
NUC1 1H  
P1 10.50 usec  
PL1 -3.00 dB  
SFO1 500.1330885 MHz

F2 - Processing parameters  
SI 32768  
SF 500.1300000 MHz  
WDW EM  
SSB 0  
LB 0.30 Hz  
GB 0  
PC 1.00

1D NMR plot parameters  
CX 20.00 cm  
CY 23.96 cm  
F1P 12.526 ppm  
F1 6264.86 Hz  
F2P 0.299 ppm  
F2 149.63 Hz  
PPMCM 0.61136 ppm/cm  
HZCM 305.76138 Hz/cm

F 1H NMR in CDCl3 at 298 K 95/5/20

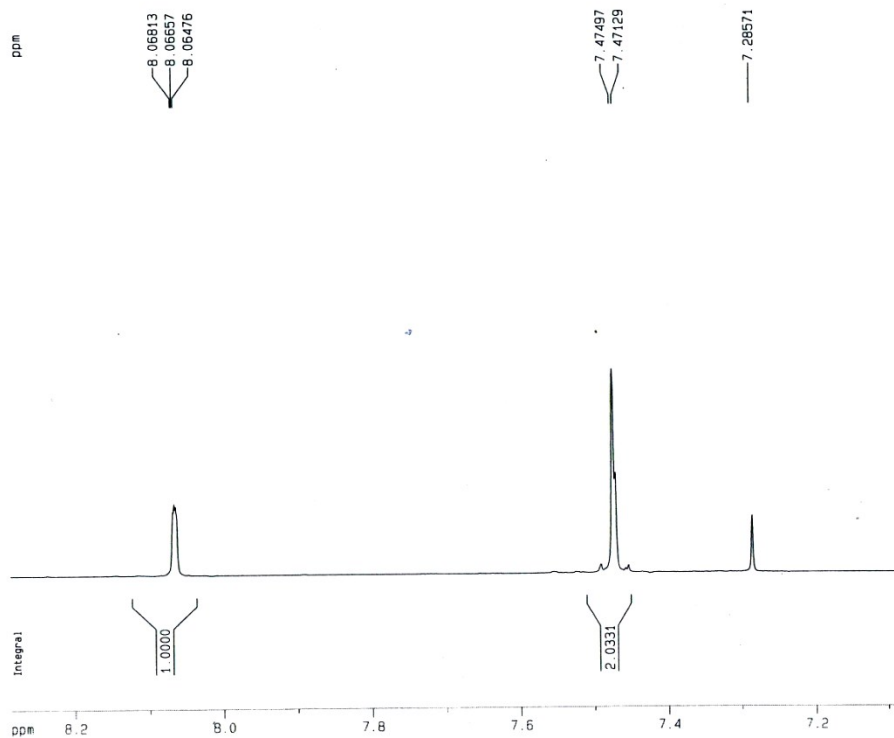

Current Data Parameters  
NAME Khaf1  
EXPNO 5  
PROCNO 1

F2 - Acquisition Parameters  
Date\_ 20160810  
Time 12.26  
INSTRUM spect  
PROBHD 5 mm QNP 1H/1  
PULPROG zg30  
TD 32768  
SOLVENT DMSO  
NS 16  
DS 0  
SWH 10330.578 Hz  
FIDRES 0.315264 Hz  
AQ 1.5860696 sec  
RG 256  
DM 48.400 usec  
DE 6.00 usec  
TE 298.0 K  
D1 5.00000000 sec  
MCREST 0.00000000 sec  
MCWRK 0.01500000 sec

\*\*\*\*\* CHANNEL f1 \*\*\*\*\*  
NUC1 1H  
P1 10.50 usec  
PL1 -3.00 dB  
SFO1 500.1300885 MHz

F2 - Processing parameters  
SI 32768  
SF 500.1300000 MHz  
WDW EM  
SSB 0  
LB 0.30 Hz  
GB 0  
PC 1.00

1D NMR plot parameters  
CX 20.00 cm  
CY 23.95 cm  
F1P 8.287 ppm  
F1 4144.65 Hz  
F2P 7.085 ppm  
F2 3543.26 Hz  
PPMCM 0.06012 ppm/cm  
HZCM 30.06944 Hz/cm



g <sup>1</sup>H NMR in CDCl<sub>3</sub> at 298 K 95/5/20

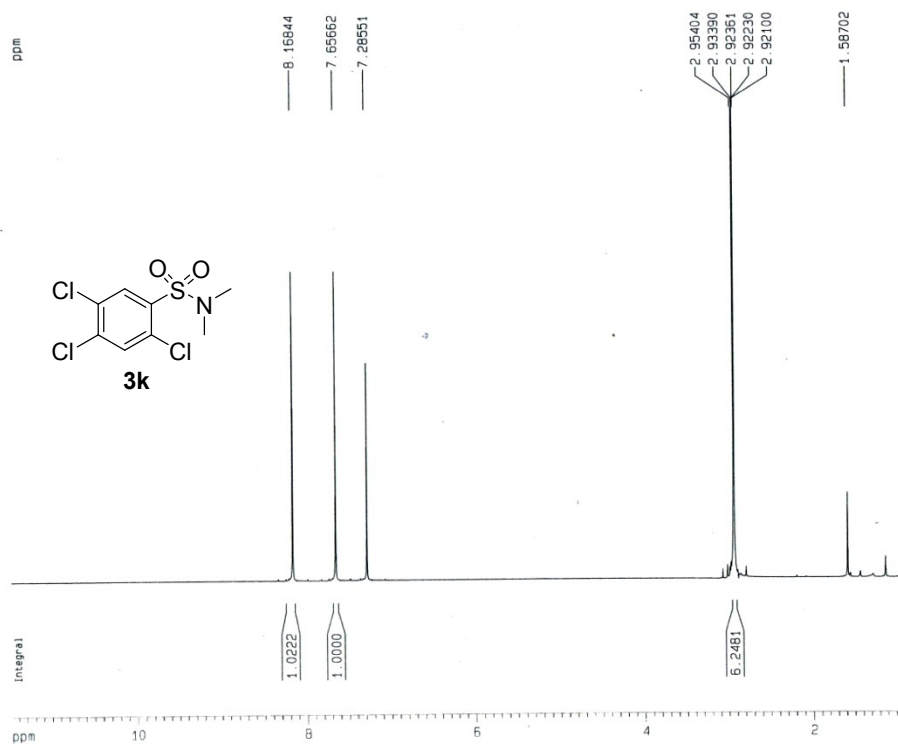

Current Data Parameters

|        |       |
|--------|-------|
| NAME   | Khafi |
| EXPNO  | 4     |
| PROCNO | 1     |

F2 - Acquisition Parameters

|         |                |
|---------|----------------|
| Date_   | 20160810       |
| Time    | 10.50          |
| INSTRUM | spect          |
| PROBHD  | 5 mm QNP 1H/1  |
| PULPROG | zg30           |
| TD      | 32768          |
| SOLVENT | DMSO           |
| DS      | 16             |
| SWH     | 10330.578 Hz   |
| FIDRES  | 0.315264 Hz    |
| AQ      | 1.5860696 sec  |
| RG      | 645.1          |
| DW      | 48.400 usec    |
| DE      | 6.00 usec      |
| TE      | 298.0 K        |
| D1      | 5.00000000 sec |
| MCREST  | 0.00000000 sec |
| MCWRK   | 0.01500000 sec |

===== CHANNEL f1 =====

|      |                 |
|------|-----------------|
| NUC1 | 1H              |
| P1   | 10.50 usec      |
| PL1  | -3.00 dB        |
| SFO1 | 500.1330885 MHz |

F2 - Processing parameters

|     |                 |
|-----|-----------------|
| SI  | 32768           |
| SF  | 500.1300000 MHz |
| WDW | EM              |
| SSB | 0               |
| LB  | 0.30 Hz         |
| GB  | 0               |
| PC  | 1.00            |

1D NMR plot parameters

|       |                 |
|-------|-----------------|
| CX    | 20.00 cm        |
| CY    | 43.82 cm        |
| F1P   | 11.488 ppm      |
| F1    | 5745.36 Hz      |
| F2P   | 0.893 ppm       |
| F2    | 446.49 Hz       |
| PPMCM | 0.52975 ppm/cm  |
| HZCM  | 264.94376 Hz/cm |

g 1H NMR in CDCl3 at 298 K 95/5/20

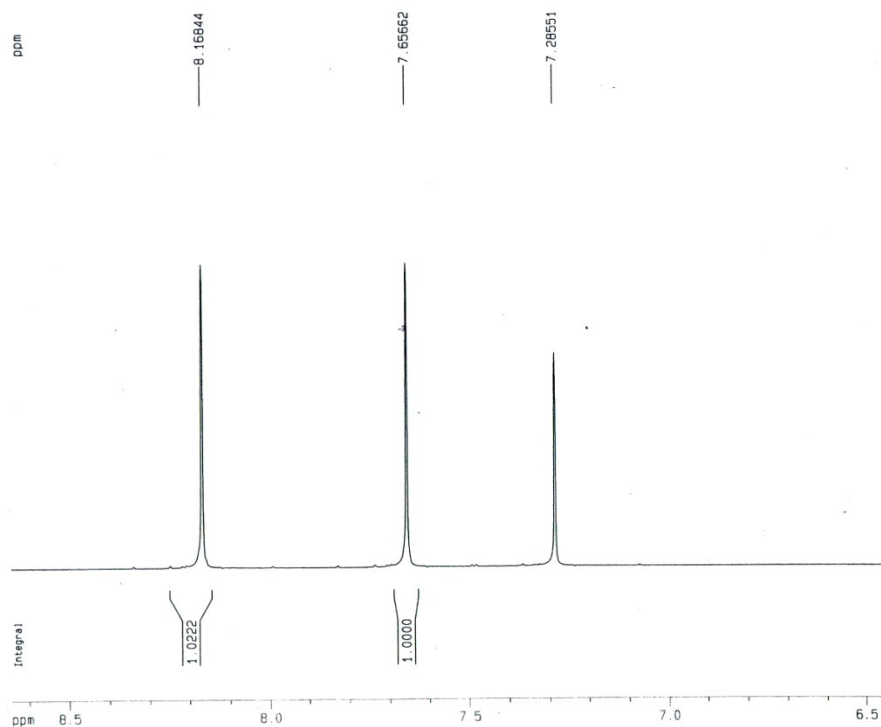

Current Data Parameters  
NAME Khafi  
EXPNO 4  
PROCNO 1

F2 - Acquisition Parameters  
Date\_ 20160810  
Time 10.50  
INSTRUM spect  
PROBHD 5 mm QNP 1H/1  
PULPROG zg30  
TD 32768  
SOLVENT DMSO  
NS 16  
DS 0  
SWH 10330.578 Hz  
FIDRES 0.315264 Hz  
AQ 1.5860695 sec  
RG 645.1  
DW 48.400 usec  
DE 6.00 usec  
TE 298.0 K  
D1 5.00000000 sec  
MCREST 0.00000000 sec  
MCWRK 0.01500000 sec

===== CHANNEL f1 =====  
NUC1 1H  
P1 10.50 usec  
PL1 -3.00 dB  
SFO1 500.1330885 MHz

F2 - Processing parameters  
SI 32768  
SF 500.1300000 MHz  
WDW EM  
SSB 0  
LB 0.30 Hz  
GB 0  
PC 1.00

1D NMR plot parameters  
CX 20.00 cm  
CY 43.82 cm  
F1P 8.646 ppm  
F1 4324.30 Hz  
F2P 6.444 ppm  
F2 3222.60 Hz  
PPMCM 0.11014 ppm/cm  
HZCM 55.08465 Hz/cm

Sample code:11 (shafieepour)

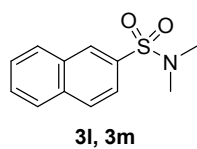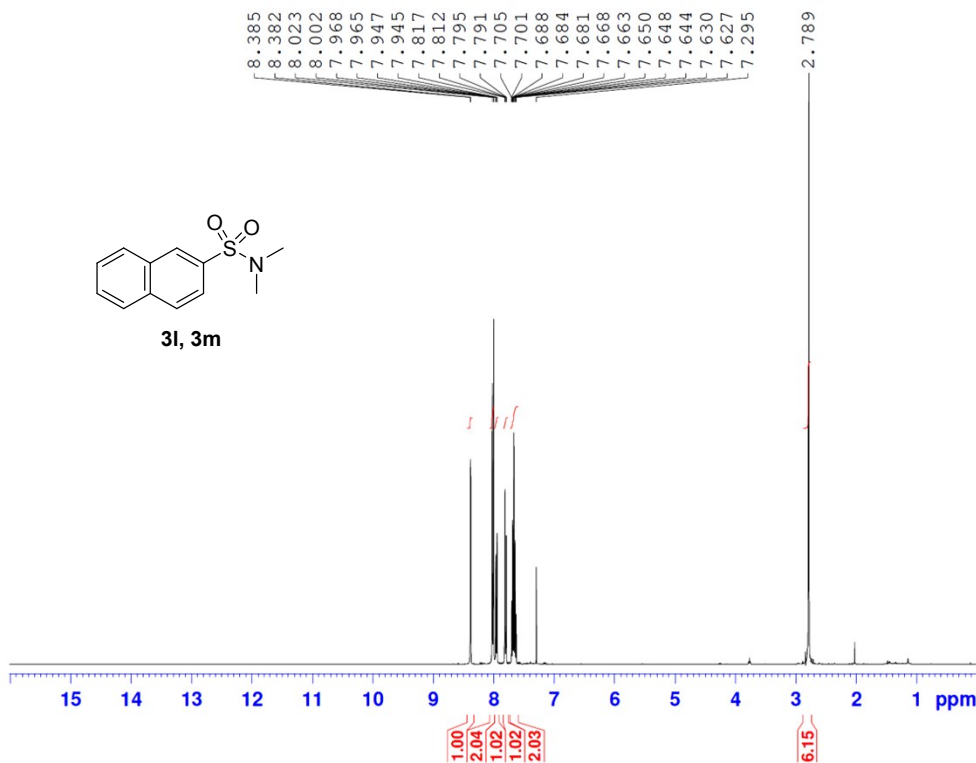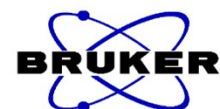

NAME Gilan UN  
 EXPNO 2450  
 PROCNO 1  
 Date\_ 20160612  
 Time 18.01  
 INSTRUM spect  
 PROBHD 5 mm PABBO BB-  
 PULPROG zg30  
 ID 65536  
 SOLVENT CDCl3  
 NS 20  
 DS 0  
 SWH 8012.820 Hz  
 FIDRES 0.122266 Hz  
 AQ 4.0894966 sec  
 RG 101  
 DW 62.400 usec  
 DE 6.50 usec  
 TE 296.4 K  
 D1 4.00000000 sec  
 TD0 1

===== CHANNEL f1 =====  
 NUC1 1H  
 P1 14.00 usec  
 PL1 -2.00 dB  
 PL1W 11.86359406 W  
 SFO1 400.2236020 MHz  
 SI 32768  
 SF 400.2200000 MHz  
 WDW EM  
 SSB 0  
 LB 0.30 Hz  
 GB 0  
 PC 1.00

Sample code:11 (shafieepour)

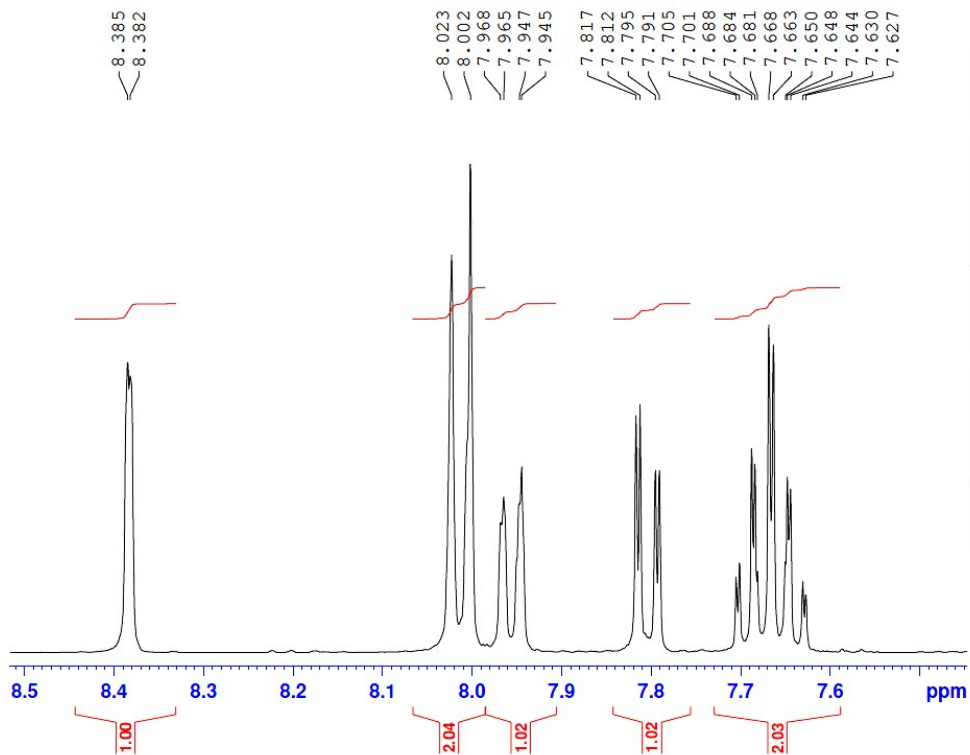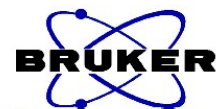

```

NAME      Gilan UN
EXPNO     2450
PROCNO    1
Date_     20160612
Time      18.01
INSTRUM   spect
PROBHD    5 mm PABBO BB-
PULPROG   zg30
TD         65536
SOLVENT   CDCl3
NS         20
DS         0
SWH        8012.820 Hz
FIDRES     0.122266 Hz
AQ         4.0894966 sec
RG         101
DW         62.400 usec
DE         6.50 usec
TE         296.4 K
D1         4.0000000 sec
TD0        1

===== CHANNEL f1 =====
NUC1       1H
P1         14.00 usec
PL1        -2.00 dB
PL1W       11.86359406 W
SFO1       400.2236020 MHz
SI         32768
SF         400.2200000 MHz
WDW        EM
SSB        0
LB         0.30 Hz
GB         0
PC         1.00
  
```

A 1H NMR in CDCl3 at 298 K 95/5/20

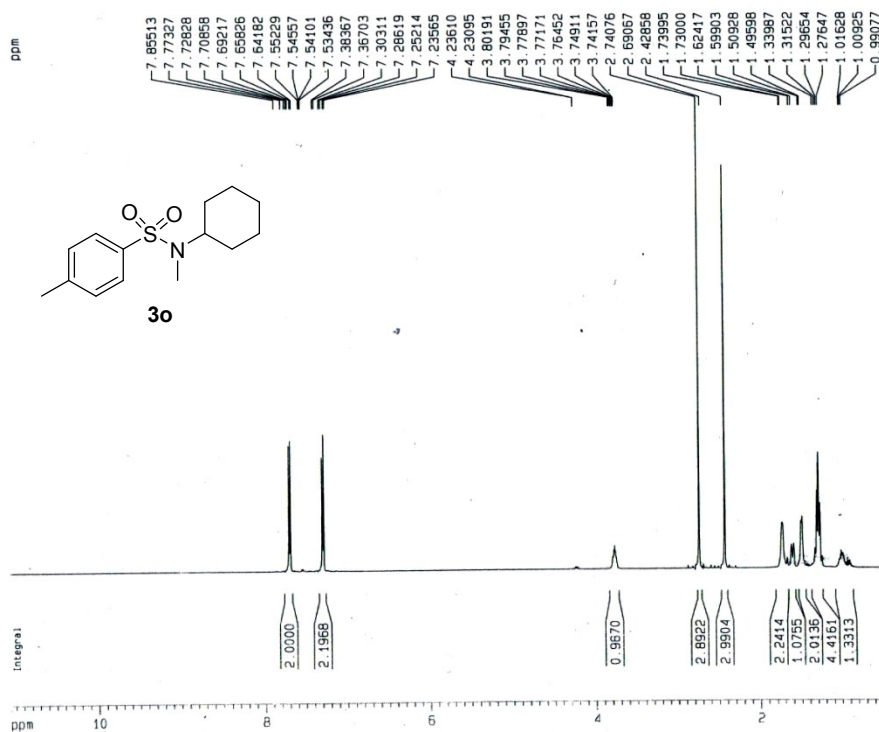

Current Data Parameters  
NAME Khaf1  
EXPNO 8  
PROCNO 1

F2 - Acquisition Parameters  
Date\_ 20160810  
Time 14.13  
INSTRUM spect  
PROBHD 5 mm QNP 1H/1  
PULPROG zg30  
TD 32768  
SOLVENT DMSO  
NS 16  
DS 0  
SWH 10330.578 Hz  
FIDRES 0.315264 Hz  
AQ 1.5860696 sec  
RG 114  
DM 48.400 usec  
DE 6.00 usec  
TE 298.0 K  
D1 5.00000000 sec  
MCREST 0.00000000 sec  
MCWCK 0.01500000 sec

===== CHANNEL f1 =====  
NUC1 1H  
P1 10.50 usec  
PL1 -3.00 dB  
SFO1 500.130085 MHz

F2 - Processing parameters  
SI 32768  
SF 500.1300000 MHz  
WDW EM  
SSB 0  
LB 0.30 Hz  
GB 0  
PC 1.00

1D NMR plot parameters  
CX 20.00 cm  
CY 12.50 cm  
F1P 11.072 ppm  
F1 5037.56 Hz  
F2P 0.448 ppm  
F2 223.85 Hz  
PPMCM 0.53123 ppm/cm  
HZCM 255.68588 Hz/cm

A <sup>1</sup>H NMR in CDCl<sub>3</sub> at 298 K 95/5/20

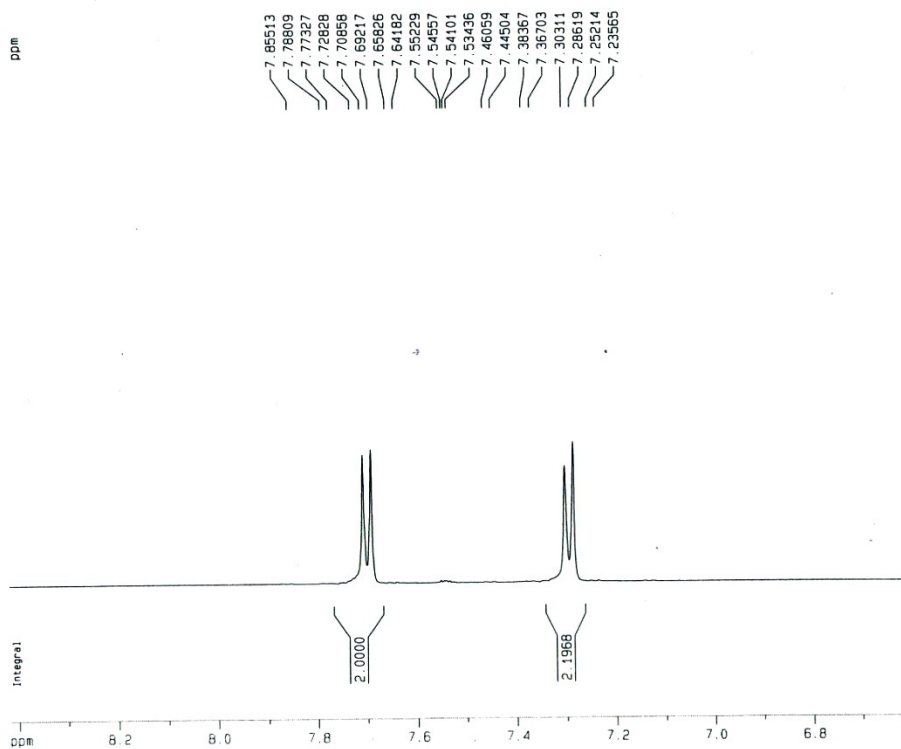

Current Data Parameters  
NAME Khafi  
EXPNO 8  
PROCNO 1

F2 - Acquisition Parameters  
Date\_ 20160810  
Time 14.13  
INSTRUM spect  
PROBHD 5 mm QNP 1H/1  
PULPROG zg30  
TD 32768  
SOLVENT DMSO  
NS 16  
DS 0  
SWH 10330.578 Hz  
FIDRES 0.315264 Hz  
AQ 1.5860596 sec  
RG 114  
DM 48.400 usec  
DE 6.00 usec  
TE 298.0 K  
D1 5.00000000 sec  
MCREST 0.00000000 sec  
MCWRR 0.01500000 sec

\*\*\*\*\* CHANNEL f1 \*\*\*\*\*  
NUC1 1H  
P1 10.50 usec  
PL1 -3.00 dB  
SFO1 500.1330885 MHz

F2 - Processing parameters  
SI 32768  
SF 500.1300000 MHz  
WDW EM  
SSB 0  
LB 0.30 Hz  
GB 0  
PC 1.00

1D NMR plot parameters  
CX 20.00 cm  
CY 12.50 cm  
F1P 8.420 ppm  
F1 4211.06 Hz  
F2P 6.604 ppm  
F2 3302.83 Hz  
PPMCM 0.09080 ppm/cm  
HZCM 45.41125 Hz/cm

A 1H NMR in CDCl3 at 298 K 95/5/20

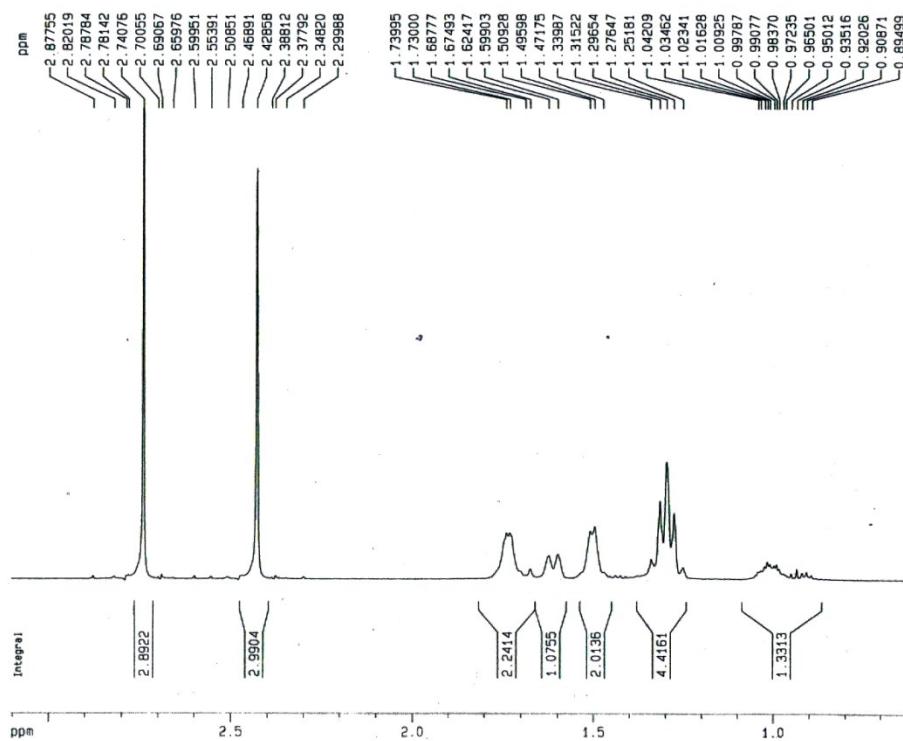

Current Data Parameters  
NAME Khafi  
EXPNO 8  
PROCNO 1

F2 - Acquisition Parameters  
Date\_ 20160810  
Time 14.13  
INSTRUM spect  
PROBHD 5 mm QNP  
PULPROG zg30  
TD 32768  
SOLVENT DMSO  
NS 16  
DS 0  
SWH 10330.578 Hz  
FIDRES 0.315264 Hz  
AQ 1.5860696 sec  
RG 114  
DW 48.400 usec  
DE 6.00 usec  
TE 298.0 K  
D1 5.00000000 sec  
MCREST 0.00000000 sec  
MCMRK 0.01500000 sec

===== CHANNEL f1 =====  
NUC1 1H  
P1 10.50 usec  
PL1 -3.00 dB  
SFO1 500.1330885 MHz

F2 - Processing parameters  
SI 32768  
SF 500.1300000 MHz  
WDW EM  
SSB 0  
LB 0.30 Hz  
GB 0  
PC 1.00

1D NMR plot parameters  
CX 20.00 cm  
CY 12.50 cm  
FIP 3.104 ppm  
F1 1952.28 Hz  
F2P 0.631 ppm  
F2 315.46 Hz  
PPMCH 0.12365 ppm/cm  
HZCM 61.84068 Hz/cm

B 1H NMR in CDCl3 at 298 K 95/5/20

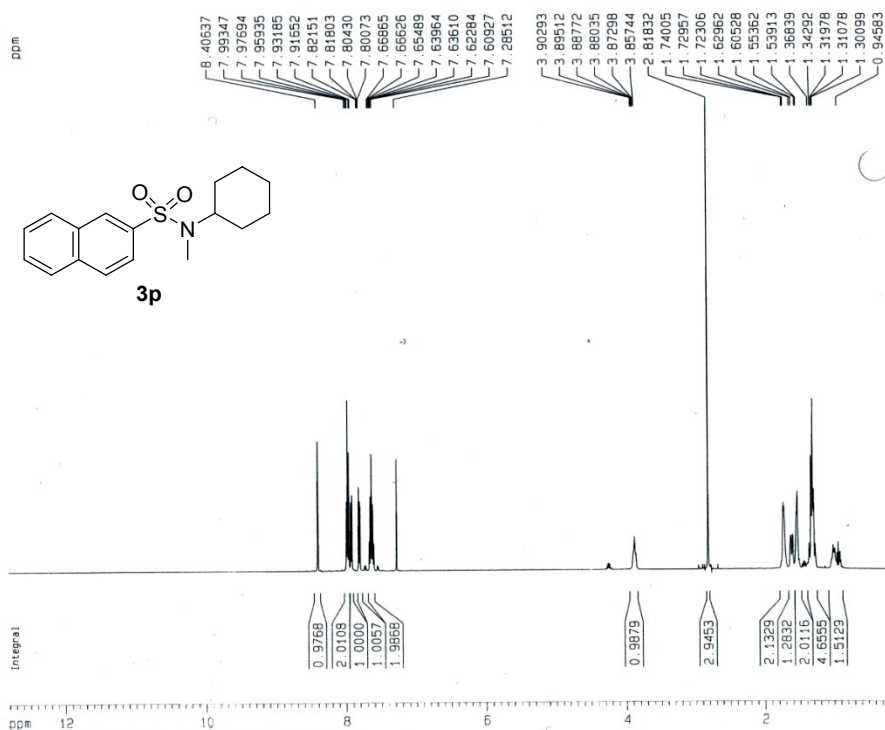

Current Data Parameters  
NAME Khf1  
EXPNO 3  
PROCNO 1

F2 - Acquisition Parameters  
Date\_ 20160810  
Time 10.43  
INSTRUM spect  
PROBHD 5 mm QNP 1H/1  
PULPROG zg30  
TD 32768  
SOLVENT DMSO  
NS 16  
DS 0  
SWH 10330.578 Hz  
FIDRES 0.315264 Hz  
AQ 1.5860696 sec  
RG 228.1  
DW 48.400 usec  
DE 6.00 usec  
TE 298.0 K  
D1 5.00000000 sec  
MCREST 0.00000000 sec  
MCWRR 0.01500000 sec

===== CHANNEL f1 =====  
NUC1 1H  
P1 10.50 usec  
PL1 -3.00 dB  
SFO1 500.1300885 MHz

F2 - Processing parameters  
SI 32768  
SF 500.1300000 MHz  
WDW EM  
SSB 0  
LB 0.30 Hz  
GB 0  
PC 1.00

1D NMR plot parameters  
CX 20.00 cm  
CY 19.74 cm  
F1P 12.823 ppm  
F1 6413.29 Hz  
F2P 0.210 ppm  
F2 105.11 Hz  
PPMCM 0.63865 ppm/cm  
HZCM 315.40918 Hz/cm



B 1H NMR in CDCl3 at 298 K 95/5/20

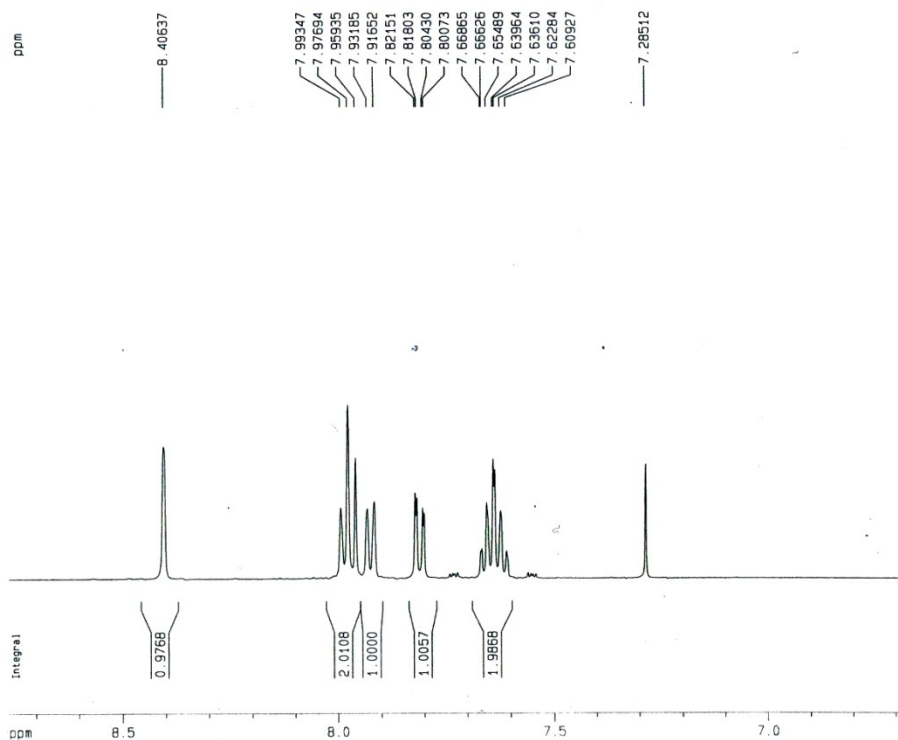

Current Data Parameters  
NAME Khaf1  
EXPNO 3  
PROCNO 1

F2 - Acquisition Parameters  
Date\_ 20160810  
Time 10.43  
INSTRUM spect  
PROBHD 5 mm QNP 1H/1  
PULPROG zg30  
TD 32768  
SOLVENT DMSO  
NS 16  
DS 0  
SWH 10330.578 Hz  
FIDRES 0.315264 Hz  
AQ 1.5860696 sec  
RG 228.1  
DW 48.400 usec  
DE 6.00 usec  
TE 298.0 K  
D1 5.00000000 sec  
MCREST 0.00000000 sec  
MCWAK 0.01500000 sec

\*\*\*\*\* CHANNEL f1 \*\*\*\*\*  
NUC1 1H  
P1 10.50 usec  
PL1 -3.00 dB  
SFO1 500.1330885 MHz

F2 - Processing parameters  
SI 32768  
SF 500.1330000 MHz  
WDW EM  
SSB 0  
LB 0.30 Hz  
GB 0  
PC 1.00

ID NMR plot parameters  
CX 20.00 cm  
CY 19.74 cm  
F1P 8.764 ppm  
F1 4383.07 Hz  
F2P 6.680 ppm  
F2 3340.77 Hz  
PPMCM 0.10420 ppm/cm  
HZCM 52.11503 Hz/cm

B 1H NMR in CDCl3 at 298 K 95/5/20

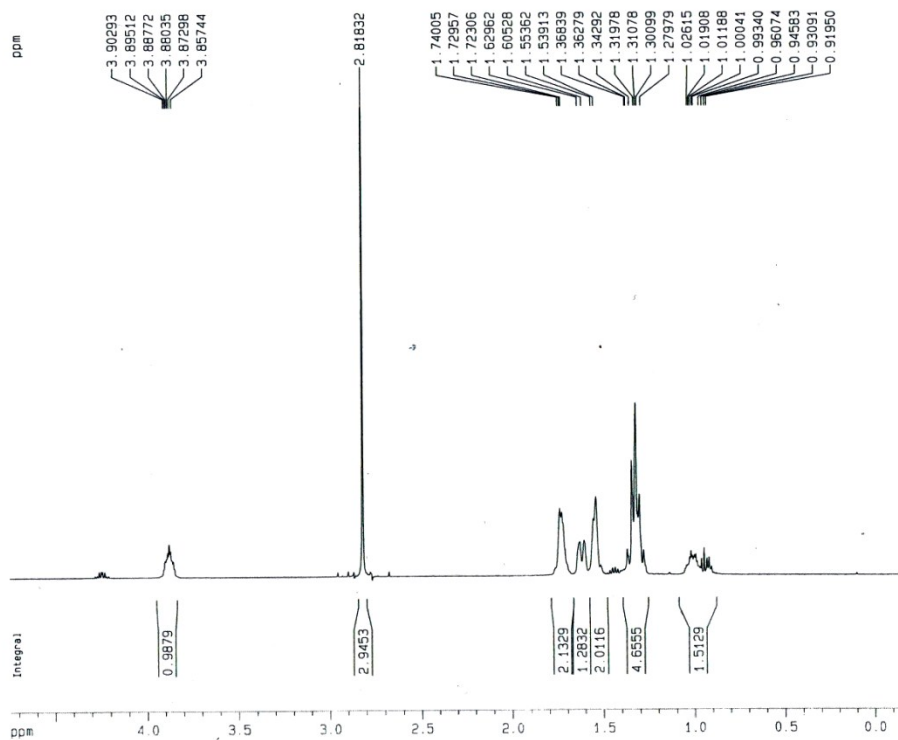

Current Data Parameters  
NAME Khaf1  
EXPNO 3  
PROCNO 1

F2 - Acquisition Parameters  
Date\_ 20160810  
Time 10:43  
INSTRUM spect  
PROBHD 5 mm GNP 1H/1  
PULPROG zg30  
TD 32768  
SOLVENT DMSO  
NS 16  
DS 0  
SWH 10330.578 Hz  
FIDRES 0.315264 Hz  
AQ 1.5860696 sec  
RG 228.1  
DM 48.400 usec  
DE 6.00 usec  
TE 298.0 K  
D1 5.00000000 sec  
MCREST 0.00000000 sec  
MCWRK 0.01500000 sec

===== CHANNEL f1 =====  
NUC1 1H  
P1 10.50 usec  
PL1 -3.00 dB  
SFO1 500.1330885 MHz

F2 - Processing parameters  
SI 32768  
SF 500.13300000 MHz  
WDW EM  
SSB 0  
LB 0.30 Hz  
GB 0  
PC 1.00

1D NMR plot parameters  
CX 20.00 cm  
CY 19.74 cm  
F1P 4.751 ppm  
F1 2376.05 Hz  
F2P -0.146 ppm  
F2 -73.01 Hz  
PRMCM 0.24484 ppm/cm  
HZCM 122.45299 Hz/cm

SpinWorks 4: I

C13c CDCl3 D:\ Administrator 37

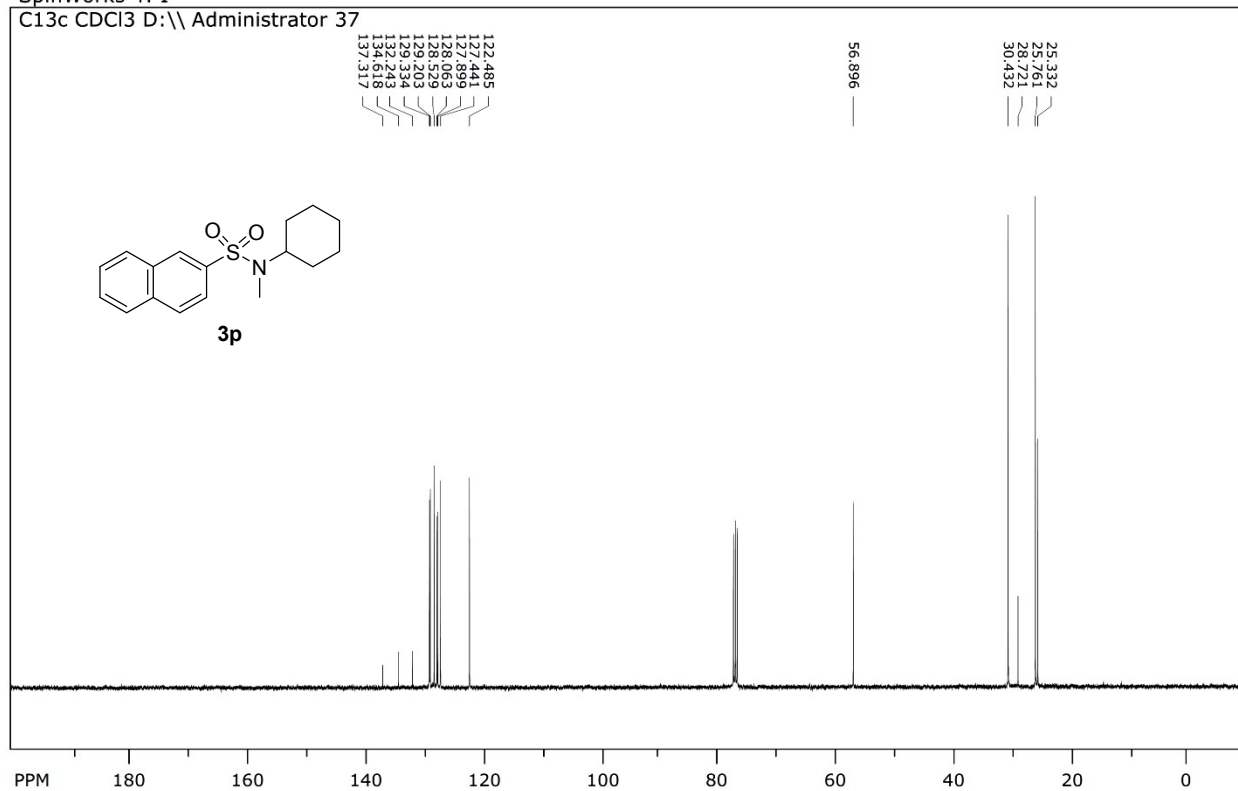

file: ...han-Mahdi-EN951018-401..408\81\fid expt: <zpgp>  
transmitter freq.: 100.623836 MHz  
time domain size: 50502 points  
width: 25252.53 Hz = 250.9597 ppm = 0.500030 Hz/pt  
number of scans: 1500

freq. of 0 ppm: 100.612769 MHz  
processed size: 32768 complex points  
LB: 1.000 GF: 0.0000  
Hz/cm: 846.150 ppm/cm: 8.40904

SpinWorks 4: I

C13c CDCl3 D:\ Administrator 37

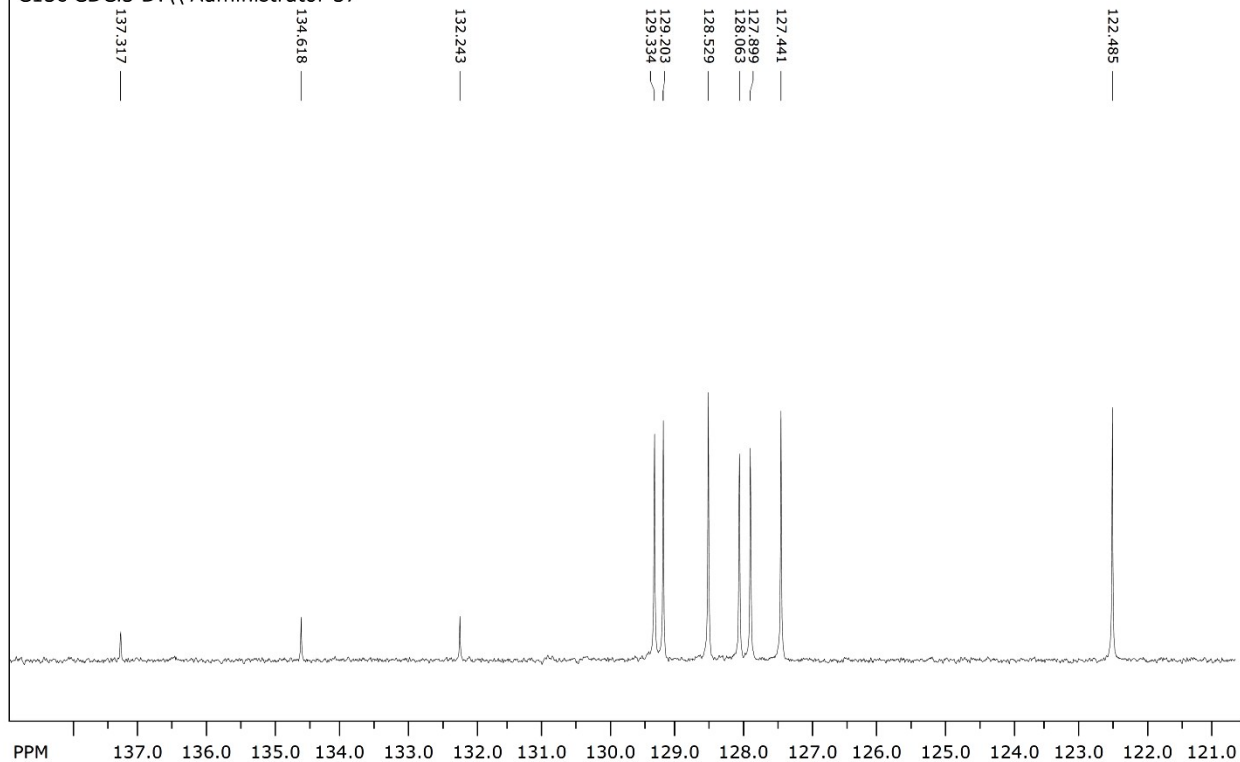

file: ...han-Mahdi-EN951018-401..408\81\fid expt: <zpgp>  
transmitter freq.: 100.623836 MHz  
time domain size: 50502 points  
width: 25252.53 Hz = 250.9597 ppm = 0.500030 Hz/pt  
number of scans: 1500

freq. of 0 ppm: 100.612769 MHz  
processed size: 32768 complex points  
LB: 1.000 GF: 0.0000  
Hz/cm: 73.843 ppm/cm: 0.73385

## V-References:

- [1] L. Friedman, R. L. Litle, W. R. Reichle, *Org. Synth.*, 1960, **40**, 93.
- [2] a) C. Buathongjan, D. Beukeaw, S. Yotphan, *Eur. J. Org. Chem.*, 2015, **2015**, 1575-1582; b) S. K. R. Parumala, R. K. Peddinti, *Tetrahedron Lett.*, 2016, **57**, 1232-1235; c) X. Pan, J. Gao, J. Liu, J. Lai, H. Jiang, G. Yuan, *Green Chem.*, 2015, **17**, 1400-1403; d) W. Li, M. Beller, X. Wu, *Chem. Commun.*, 2014, **50**, 9513-9516; e) H. Woolven, C. GonzalezRodriguez, I. Marco, A. L. Thompson, M. C. Willis, *Org. Lett.*, 2011, **13**, 4876-4878.
- [3] Campbell; Campbell; Salm Proceedings of the Indiana Academy of Science, 1947, **57**, 100.
- [4] a) J. L. Garcia Ruano,; A. Parra, L. Marzo, F. Yuste, V. M. Mastranzo, *Tetrahedron*, 2011, **67**, 2905-2910; b) R. Pandya, T. Murashima, L. Tedeschi, A. G. M. Barrett, *J. Org. Chem.*, 2003, **68**, 8274- 8276
- [5] A. M. Sh. El-Sharief, M. S. Ammar, Y. A. Ammar, M. E. A. Zaki, *Ind. J. Chem., Sec. B: Org. Chem. Inc. Med. Chem.*, 1983, **22**, 700-704.
- [6] Z. El-Hewehi, F. Runge, *J. Prakt. Chem.*, 1962, **16**, 297-336.
- [7] M. Hatano, T. Ozaki, K. Nishikawa, K. Ishihara, *J. Org. Chem.*, 2013, **78**, 10405-10413.
- [8] a) C-H. Yang, W-W. Fan, G-Q. Liu, L. Duan, L. Li, Y-M. Li, *RSC adv.*, 2015, **5**, 61081-61093; b) J. Zhang, C-G. Yang, C. He, *J. Am. Chem. Soc.*, 2006, **128**, 1798-1799.
